# Supplementary material for: Effects of Microbial Transformation on the Biological Activities of Prenylated Chalcones from Angelica keiskei
Source: MDPI journal article supplement (doi:10.3390/foods11040543), 2022-02-14
Supplement: s1 [file s1]

## Supplementary Material

Effects of Microbial Transformation on the Biological Activities of Prenylated Chalcones from *Angelica keiskei*

Yina Xiao, Ik-Soo Lee \*

College of Pharmacy, Chonnam National University, Gwangju 61186, Korea; yogurtxiao@163.com

\* Correspondence: islee@chonnam.ac.kr; Tel.: +82-62-530-2932

## Contents of Supplementary Material

|                                                                                                        |    |
|--------------------------------------------------------------------------------------------------------|----|
| Figure S1. TLC analyses for microbial transformation of <b>1-3</b> by selected microbes .....          | 4  |
| Figure S2. <sup>1</sup> H-NMR (400 MHz, methanol- <i>d</i> <sub>4</sub> ) spectrum of <b>1</b> .....   | 5  |
| Figure S3. <sup>13</sup> C-NMR (100 MHz, methanol- <i>d</i> <sub>4</sub> ) spectrum of <b>1</b> .....  | 5  |
| Figure S4. <sup>1</sup> H-NMR (400 MHz, acetone- <i>d</i> <sub>6</sub> ) spectrum of <b>2</b> .....    | 6  |
| Figure S5. <sup>13</sup> C-NMR (100 MHz, acetone- <i>d</i> <sub>6</sub> ) spectrum of <b>2</b> .....   | 6  |
| Figure S6. <sup>1</sup> H-NMR (400 MHz, acetone- <i>d</i> <sub>6</sub> ) spectrum of <b>3</b> .....    | 7  |
| Figure S7. <sup>13</sup> C-NMR (100 MHz, acetone- <i>d</i> <sub>6</sub> ) spectrum of <b>3</b> .....   | 7  |
| Figure S8. <sup>1</sup> H-NMR (500 MHz, methanol- <i>d</i> <sub>4</sub> ) spectrum of <b>4</b> .....   | 8  |
| Figure S9. <sup>13</sup> C-NMR (125 MHz, methanol- <i>d</i> <sub>4</sub> ) spectrum of <b>4</b> .....  | 8  |
| Figure S10. HSQC spectrum of <b>4</b> .....                                                            | 9  |
| Figure S11. HMBC spectrum of <b>4</b> .....                                                            | 9  |
| Figure S12. COSY spectrum of <b>4</b> .....                                                            | 10 |
| Figure S13. HRESIMS spectrum of <b>4</b> .....                                                         | 11 |
| Figure S14. <sup>1</sup> H-NMR (600 MHz, methanol- <i>d</i> <sub>4</sub> ) spectrum of <b>5</b> .....  | 12 |
| Figure S15. <sup>13</sup> C-NMR (150 MHz, methanol- <i>d</i> <sub>4</sub> ) spectrum of <b>5</b> ..... | 12 |
| Figure S16. HSQC spectrum of <b>5</b> .....                                                            | 13 |
| Figure S17. HMBC spectrum of <b>5</b> .....                                                            | 13 |
| Figure S18. COSY spectrum of <b>5</b> .....                                                            | 14 |
| Figure S19. HRESIMS spectrum of <b>5</b> .....                                                         | 15 |
| Figure S20. <sup>1</sup> H-NMR (500 MHz, methanol- <i>d</i> <sub>4</sub> ) spectrum of <b>7</b> .....  | 16 |
| Figure S21. <sup>13</sup> C-NMR (125 MHz, methanol- <i>d</i> <sub>4</sub> ) spectrum of <b>7</b> ..... | 16 |
| Figure S22. HSQC spectrum of <b>7</b> .....                                                            | 17 |
| Figure S23. HMBC spectrum of <b>7</b> .....                                                            | 17 |
| Figure S24. COSY spectrum of <b>7</b> .....                                                            | 18 |
| Figure S25. HRESIMS spectrum of <b>7</b> .....                                                         | 19 |
| Figure S26. <sup>1</sup> H-NMR (600 MHz, DMSO- <i>d</i> <sub>6</sub> ) spectrum of <b>10</b> .....     | 20 |
| Figure S27. <sup>13</sup> C-NMR (150 MHz, DMSO- <i>d</i> <sub>6</sub> ) spectrum of <b>10</b> .....    | 20 |
| Figure S28. HSQC spectrum of <b>10</b> .....                                                           | 21 |
| Figure S29. HMBC spectrum of <b>10</b> .....                                                           | 21 |

|                                                                                                         |    |
|---------------------------------------------------------------------------------------------------------|----|
| Figure S30. COSY spectrum of <b>10</b> .....                                                            | 22 |
| Figure S31. HRESIMS spectrum of <b>10</b> .....                                                         | 23 |
| Figure S32. <sup>1</sup> H-NMR (500 MHz, methanol- <i>d</i> <sub>4</sub> ) spectrum of <b>6</b> .....   | 24 |
| Figure S33. <sup>13</sup> C-NMR (125 MHz, methanol- <i>d</i> <sub>4</sub> ) spectrum of <b>6</b> .....  | 24 |
| Figure S34. <sup>1</sup> H-NMR (500 MHz, methanol- <i>d</i> <sub>4</sub> ) spectrum of <b>8</b> .....   | 25 |
| Figure S35. <sup>13</sup> C-NMR (100 MHz, methanol- <i>d</i> <sub>4</sub> ) spectrum of <b>8</b> .....  | 25 |
| Figure S36. <sup>1</sup> H-NMR (500 MHz, methanol- <i>d</i> <sub>4</sub> ) spectrum of <b>9</b> .....   | 26 |
| Figure S37. <sup>13</sup> C-NMR (125 MHz, methanol- <i>d</i> <sub>4</sub> ) spectrum of <b>9</b> .....  | 26 |
| Figure S38. <sup>1</sup> H-NMR (500 MHz, acetone- <i>d</i> <sub>6</sub> ) spectrum of <b>11</b> .....   | 27 |
| Figure S39. <sup>13</sup> C-NMR (125 MHz, acetone- <i>d</i> <sub>6</sub> ) spectrum of <b>11</b> .....  | 27 |
| Figure S40. <sup>1</sup> H-NMR (600 MHz, methanol- <i>d</i> <sub>4</sub> ) spectrum of <b>12</b> .....  | 28 |
| Figure S41. <sup>13</sup> C-NMR (150 MHz, methanol- <i>d</i> <sub>4</sub> ) spectrum of <b>12</b> ..... | 28 |

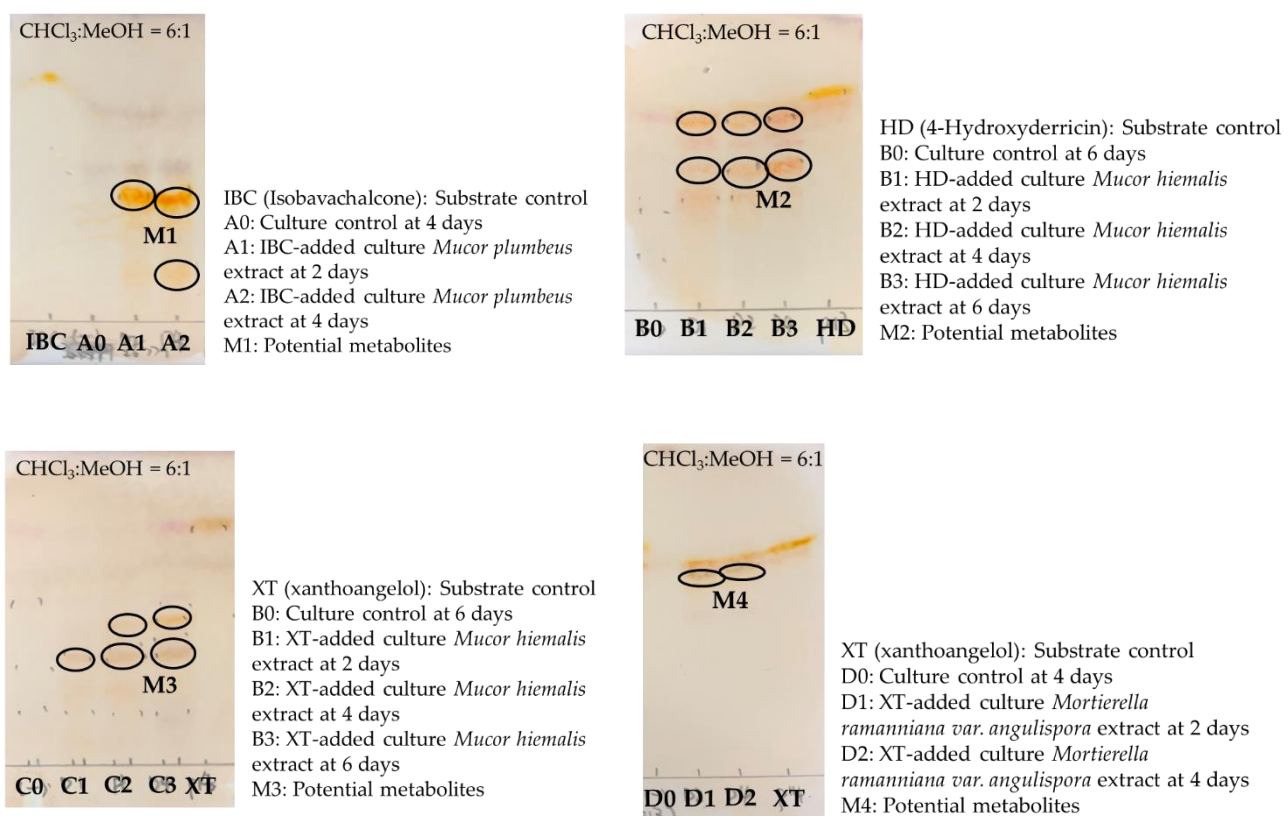

Figure S1. TLC analyses for microbial transformation of 1-3 by selected microbes

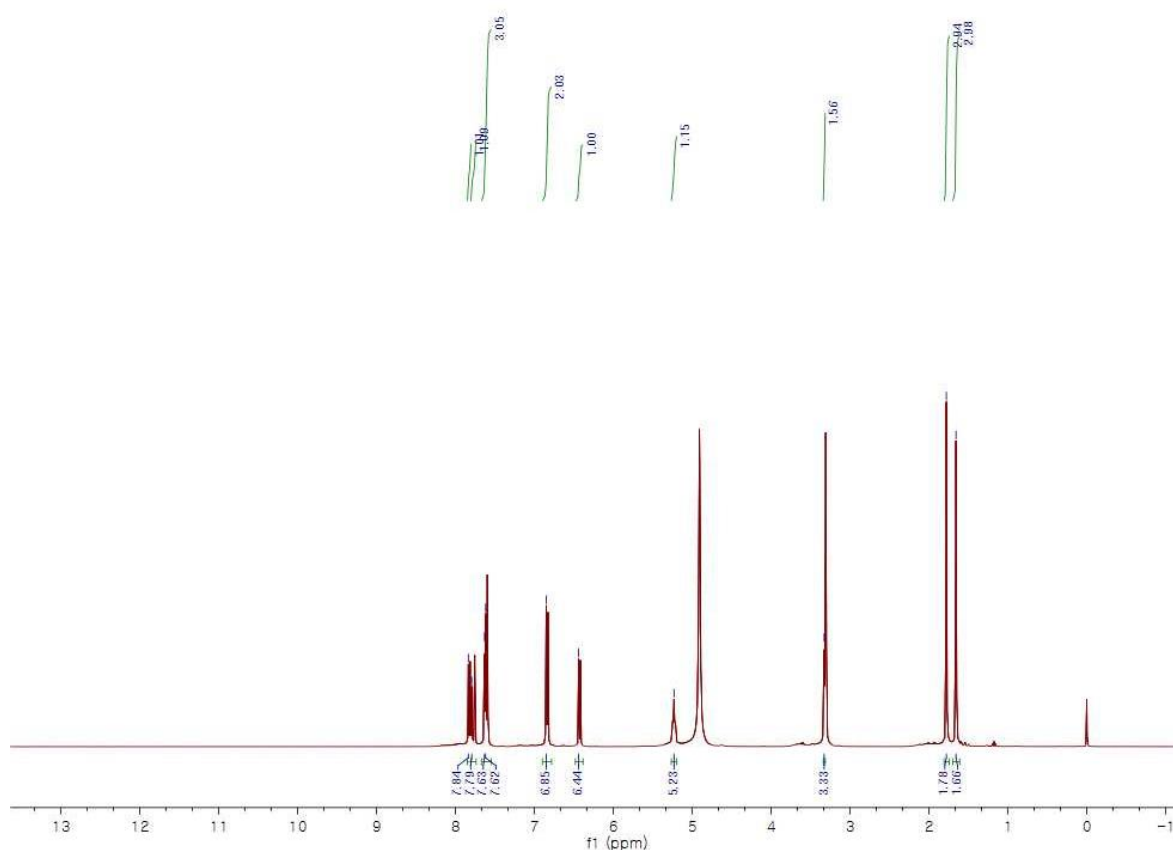

Figure S2.  $^1\text{H}$ -NMR (400 MHz, methanol- $d_4$ ) spectrum of **1**

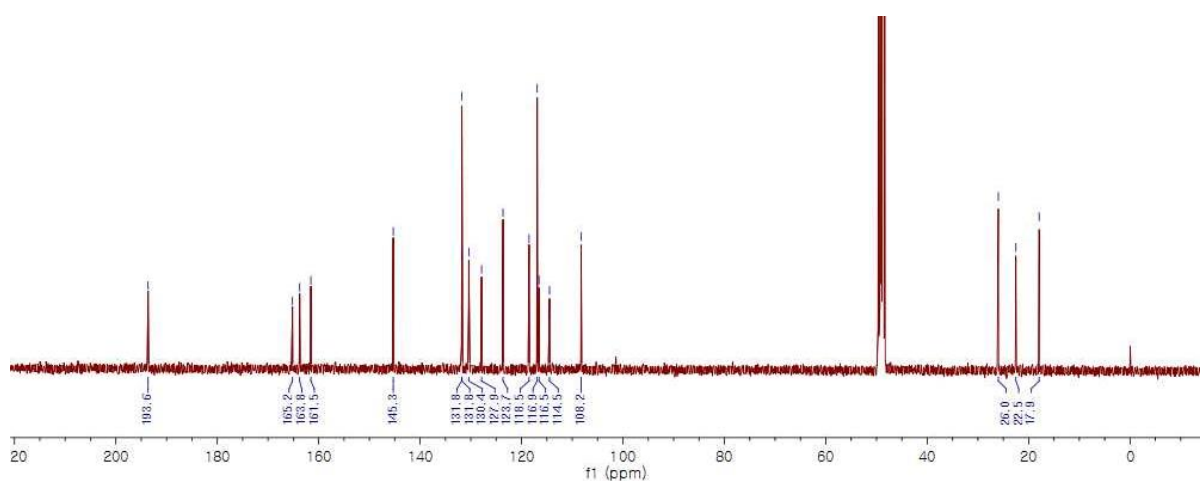

Figure S3.  $^{13}\text{C}$ -NMR (100 MHz, methanol- $d_4$ ) spectrum of **1**

Isobavachalcone (**1**):  $^1\text{H}$ -NMR (methanol- $d_4$ , 400 MHz,  $\delta$  in ppm,  $J$  in Hz)  $\delta$  7.84 (1H, d,  $J$  = 8.9, H-6'), 7.79 (1H, d,  $J$  = 15.4, H- $\beta$ ), 7.63 (1H, d,  $J$  = 15.4, H- $\alpha$ ), 7.62 (2H, d,  $J$  = 8.8, H-2,6), 6.85 (2H, d,  $J$  = 8.8, H-3,5), 6.44 (1H, d,  $J$  = 8.9, H-5'), 5.23 (1H, m, H-2''), 3.33 (2H, d,  $J$  = 7.2, H-1''), 1.78 (3H, s, H-4''), 1.66 (3H, s, H-5'');  $^{13}\text{C}$ -NMR (methanol- $d_4$ , 100 MHz,  $\delta$  in ppm): 193.6 (C=O), 165.2 (C-4'), 163.8 (C-2'), 161.5 (C-4), 145.3 (C- $\beta$ ), 131.8 (C-2,6), 131.8 (C-3''), 130.4 (C-6'), 127.9 (C-1), 123.7 (C-2''), 118.5 (C- $\alpha$ ), 116.9 (C-3,5), 116.5 (C-3'), 114.5 (C-1'), 108.2 (C-5'), 26.0 (C-4''), 22.5 (C-1''), 17.9 (C-5').

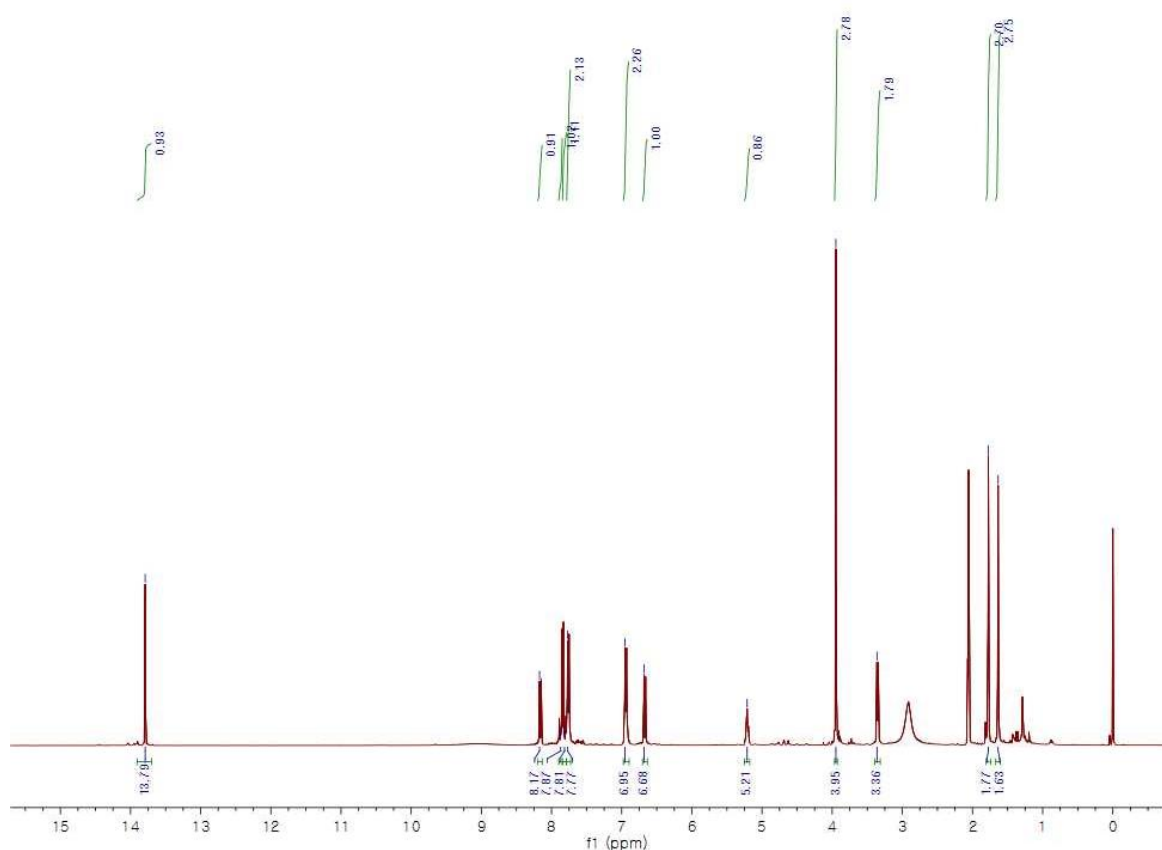

Figure S4.  $^1\text{H}$ -NMR (400 MHz, acetone- $d_6$ ) spectrum of **2**

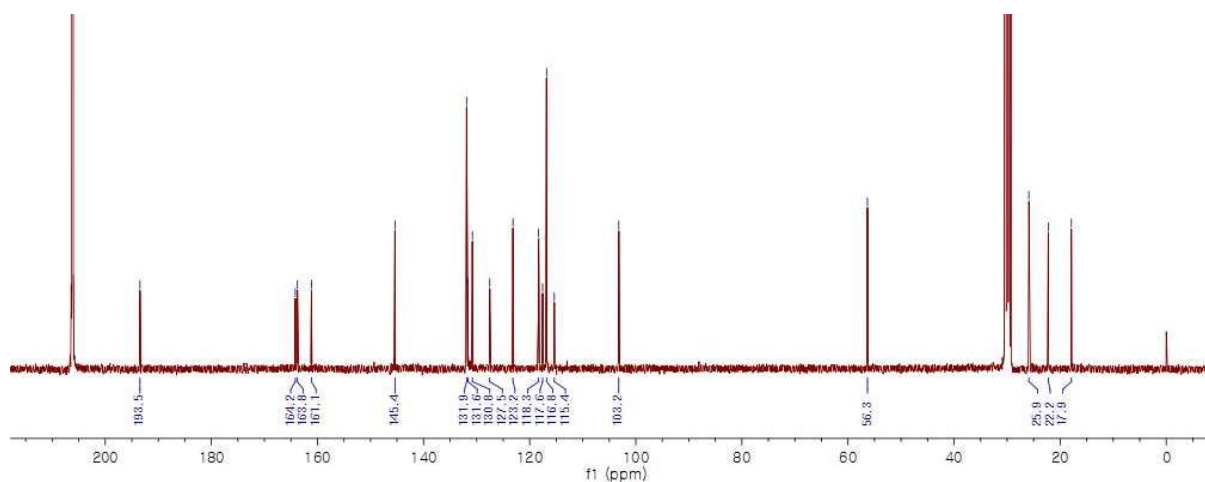

Figure S5.  $^{13}\text{C}$ -NMR (100 MHz, acetone- $d_6$ ) spectrum of **2**

4-Hydroxyderricin (**2**):  $^1\text{H}$ -NMR (acetone- $d_6$ , 400 MHz,  $\delta$  in ppm,  $J$  in Hz)  $\delta$  13.79 (1H, s, OH), 8.17 (1H, d,  $J$  = 9.0, H-6'), 7.87 (1H, d,  $J$  = 15.4, H- $\beta$ ), 7.81 (1H, d,  $J$  = 15.4, H- $\alpha$ ), 7.77 (2H, d,  $J$  = 8.5, H-2,6), 6.95 (2H, d,  $J$  = 8.5, H-3,5), 6.68 (1H, d,  $J$  = 9.0, H-5'), 5.21 (1H, m, H-2''), 3.95 (3H, s, OMe), 3.36 (2H, d,  $J$  = 7.2, H-1''), 1.77 (3H, s, H-4''), 1.63 (3H, s, H-5'');  $^{13}\text{C}$ -NMR (acetone- $d_6$ , 100 MHz,  $\delta$  in ppm): 193.5 (C=O), 164.2 (C-4'), 163.8 (C-2'), 161.1 (C-4), 145.4 (C- $\beta$ ), 131.9 (C-2,6), 131.6 (C-3''), 130.8 (C-6'), 127.5 (C-1), 123.2 (C-2''), 118.3 (C- $\alpha$ ), 117.6 (C-3'), 116.8 (C-3,5), 115.4 (C-1'), 103.2 (C-5'), 56.8 (OMe), 25.9 (C-4''), 22.1 (C-1''), 17.9 (C-5'').

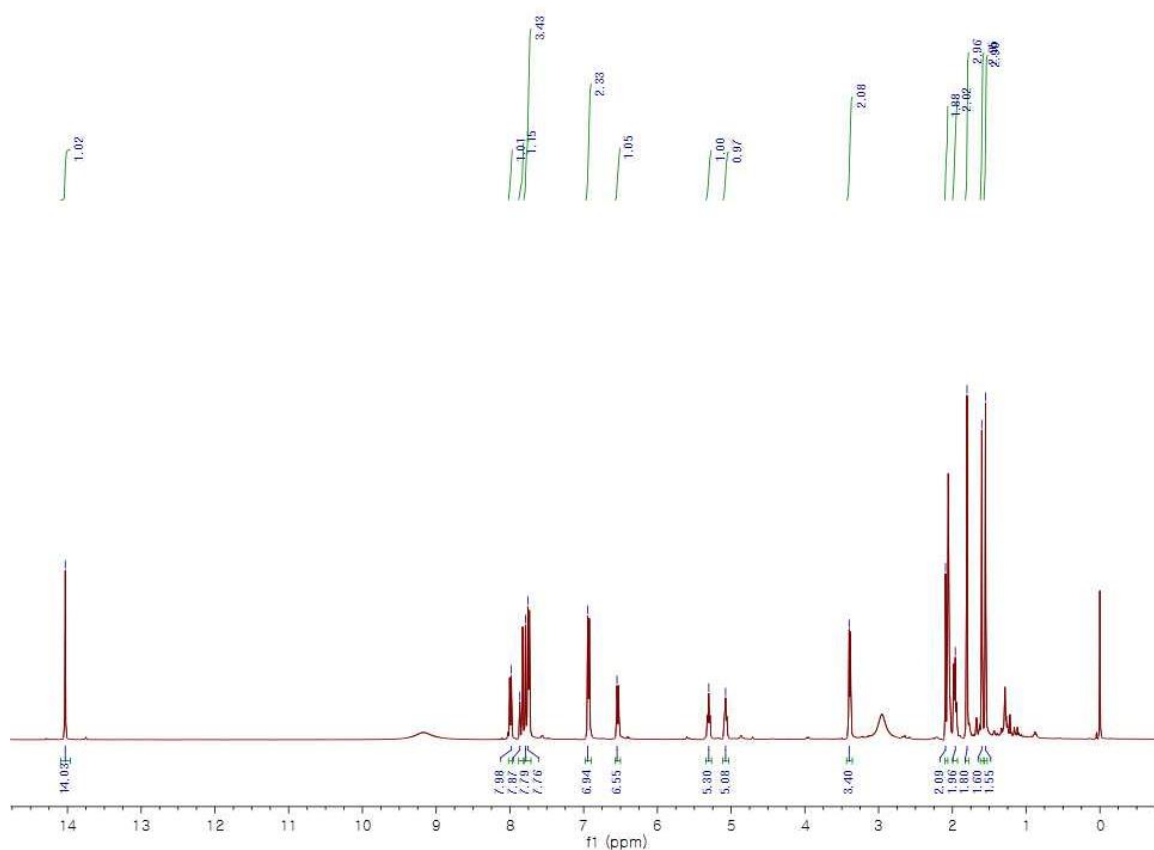

Figure S6.  $^1\text{H}$ -NMR (400 MHz, acetone- $d_6$ ) spectrum of **3**

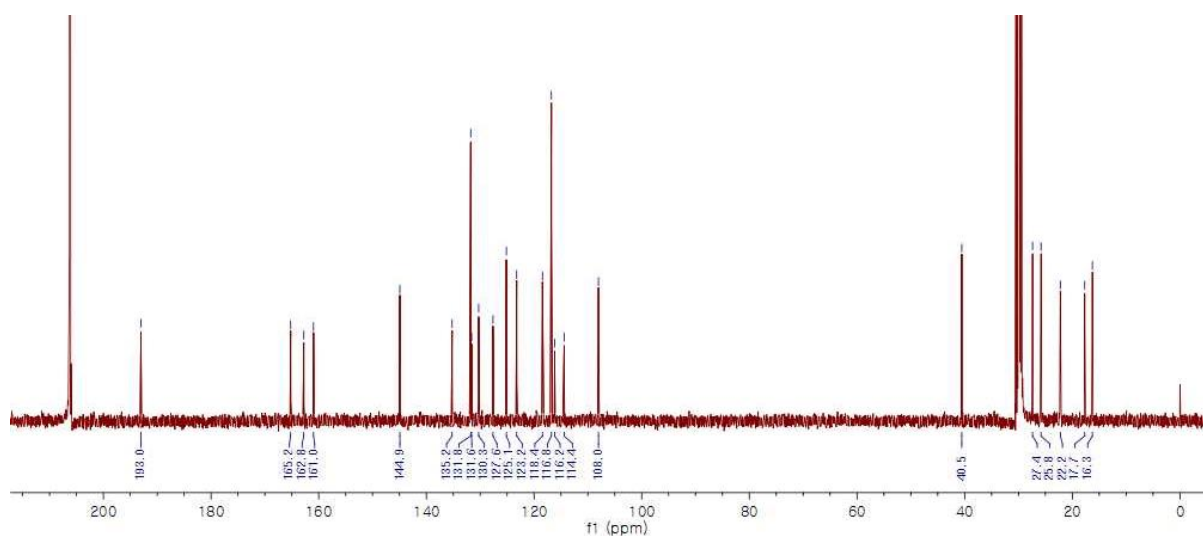

Figure S7.  $^{13}\text{C}$ -NMR (100 MHz, acetone- $d_6$ ) spectrum of **3**

Xanthoangelol (**3**):  $^1\text{H}$ -NMR (acetone- $d_6$ , 400 MHz,  $\delta$  in ppm,  $J$  in Hz)  $\delta$  14.03 (1H, s, OH), 7.98 (1H, d,  $J$  = 8.8, H-6'), 7.87 (1H, d,  $J$  = 15.2, H- $\beta$ ), 7.79 (1H, d,  $J$  = 15.2, H- $\alpha$ ), 7.76 (2H, d,  $J$  = 8.5, H-2,6), 6.94 (2H, d,  $J$  = 8.5, H-3,5), 6.55 (1H, d,  $J$  = 8.8, H-5'), 5.30 (1H, m, H-2''), 5.08 (1H, m, H-6''), 3.40 (2H, d,  $J$  = 7.1, H-1''), 2.09 (2H, overlapped, H-5''), 1.96 (2H, m, H-4''), 1.80 (3H, s, H-10''), 1.60 (3H, s, H-8''), 1.55 (3H, s, H-9'');  $^{13}\text{C}$ -NMR (acetone- $d_6$ , 100 MHz,  $\delta$  in ppm): 193.0 (C=O), 165.2 (C-4'), 162.8 (C-2'), 161.0 (C-4), 144.9 (C- $\beta$ ), 135.2 (C-3''), 131.8 (C-2,6), 131.6 (C-7''), 130.3 (C-6'), 127.6 (C-1), 125.1 (C-6''), 123.2 (C-2''), 118.4 (C- $\alpha$ ), 116.8 (C-3,5), 116.2 (C-3'), 114.4 (C-1'), 108.0 (C-5'), 40.5 (C-4''), 27.4 (C-5''), 25.8 (C-8''), 22.2 (C-1''), 17.7 (C-9''), 16.3 (C-10'').

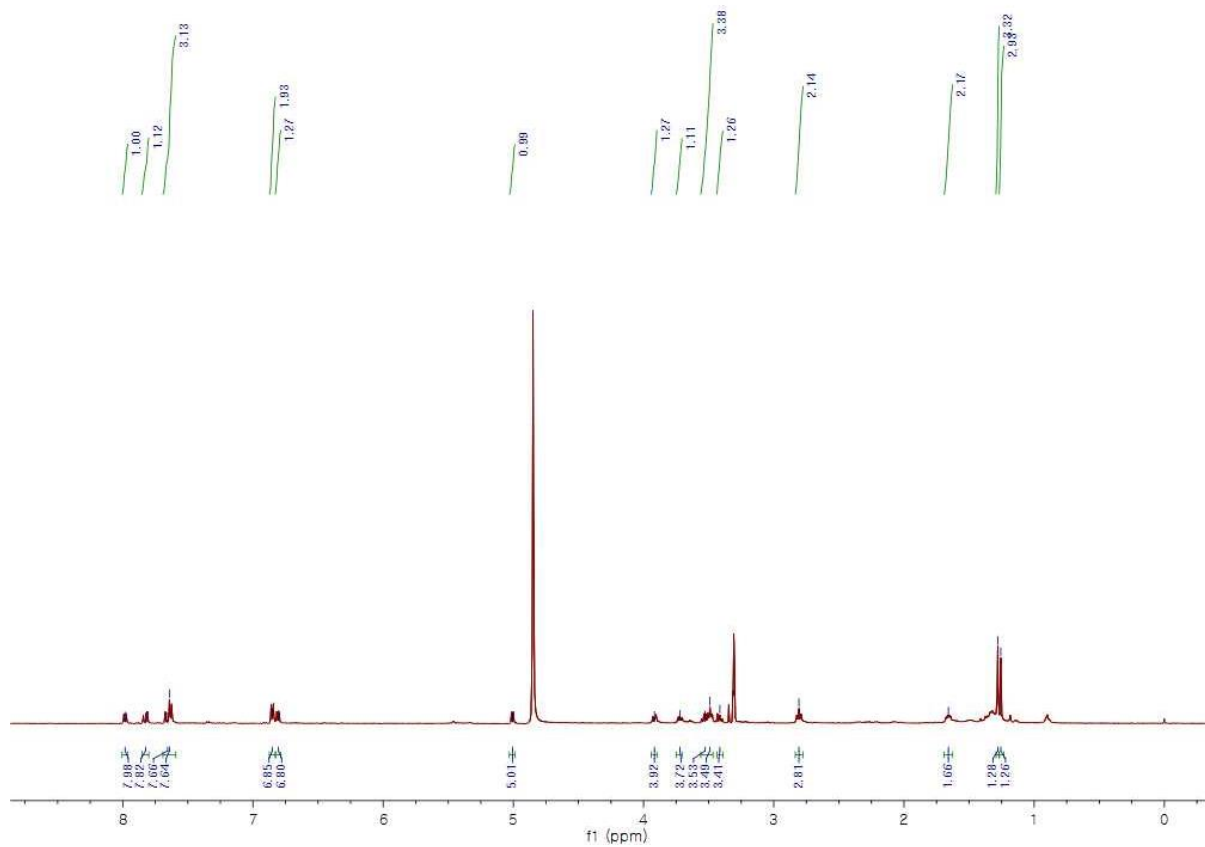

Figure S8. <sup>1</sup>H-NMR (500 MHz, methanol-*d*<sub>4</sub>) spectrum of **4**

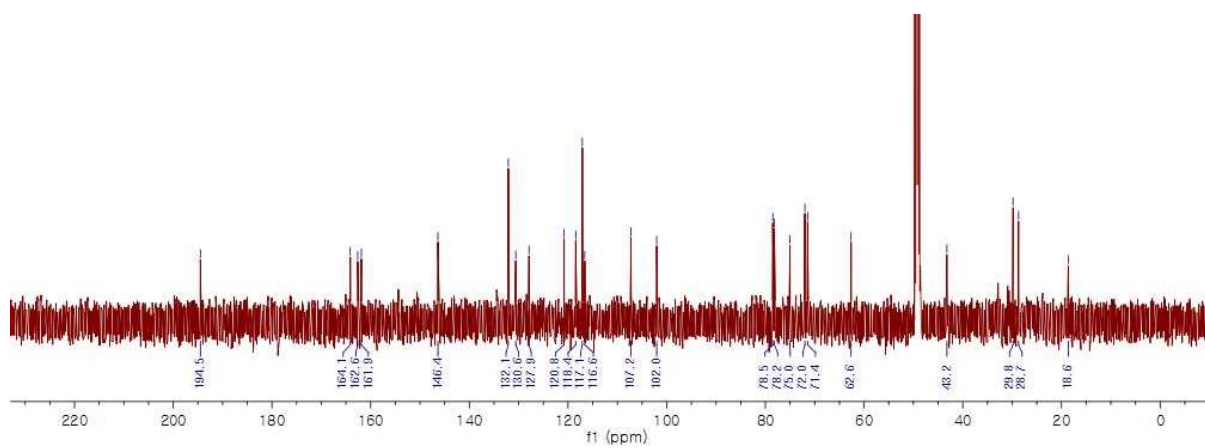

Figure S9. <sup>13</sup>C-NMR (125 MHz, methanol-*d*<sub>4</sub>) spectrum of **4**



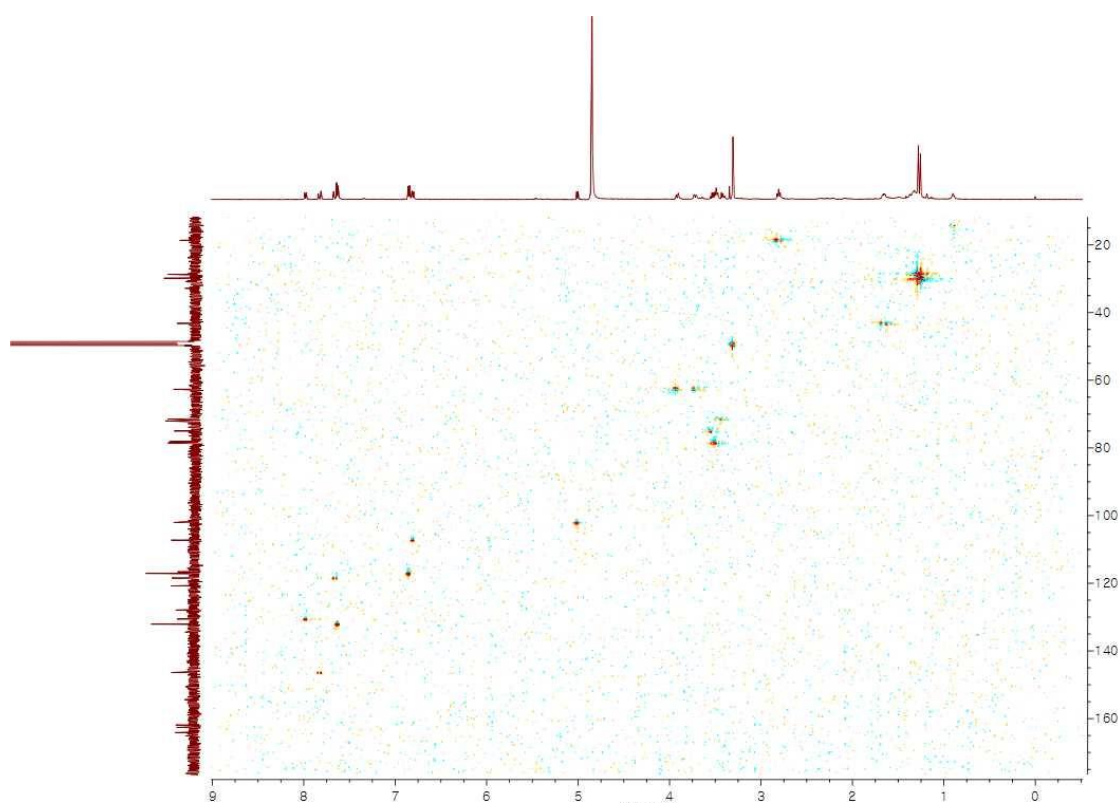

Figure S10. HSQC spectrum of **4**

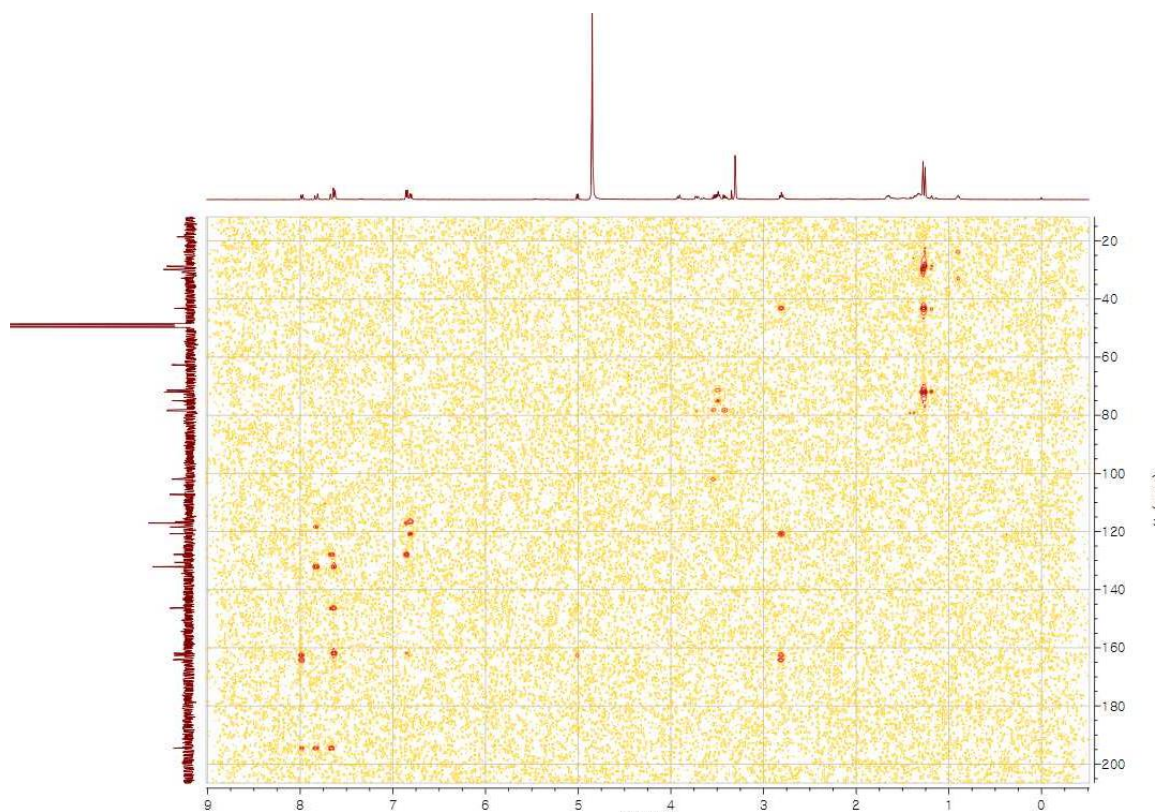

Figure S11. HMBC spectrum of **4**

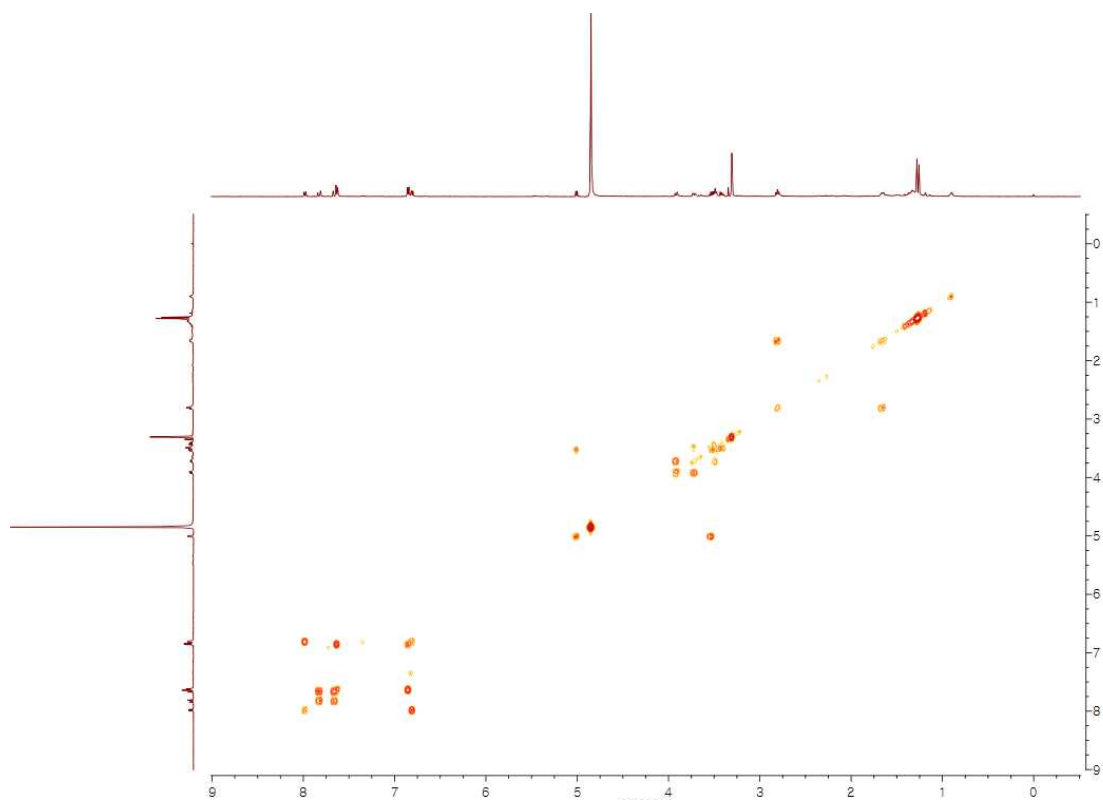

Figure S12. COSY spectrum of **4**

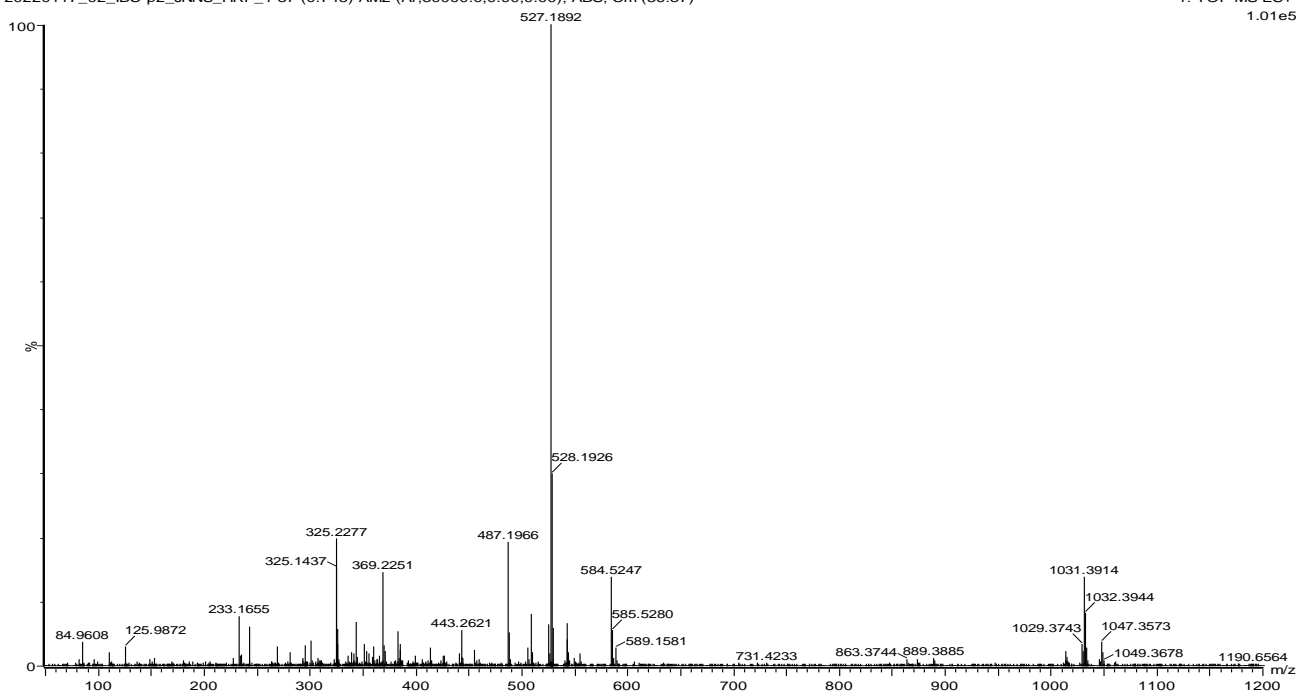

### Elemental Composition Report

#### Single Mass Analysis

Tolerance = 5.0 PPM / DBE: min = -3.0, max = 200.0

Element prediction: Off

Number of isotope peaks used for i-FIT = 3

#### Monoisotopic Mass, Even Electron Ions

Elements Used:

C: 0-35 H: 0 -50 O: 0 -10 Na: 0 -1

Minimum: -3.0

Maximum: 300.0 5.0 200.0

| Mass     | Calc. Mass | mDa  | PPM  | DBE  | i-FIT | Norm | Conf(%) | Formula                                            |
|----------|------------|------|------|------|-------|------|---------|----------------------------------------------------|
| 525.1732 | 525.1737   | -0.5 | -1.0 | 11.5 | 476.2 | n/a  | n/a     | C <sub>26</sub> H <sub>30</sub> O <sub>10</sub> Na |

|          |          |      |      |      |       |       |       |                                                    |
|----------|----------|------|------|------|-------|-------|-------|----------------------------------------------------|
| 527.1892 | 527.1893 | -0.1 | -0.2 | 10.5 | 572.9 | 0.005 | 99.47 | C <sub>26</sub> H <sub>32</sub> O <sub>10</sub> Na |
|          | 527.1917 | -2.5 | -4.7 | 13.5 | 578.2 | 5.235 | 0.53  | C <sub>28</sub> H <sub>31</sub> O <sub>10</sub>    |

Figure S13. HRESIMS spectrum of **4**

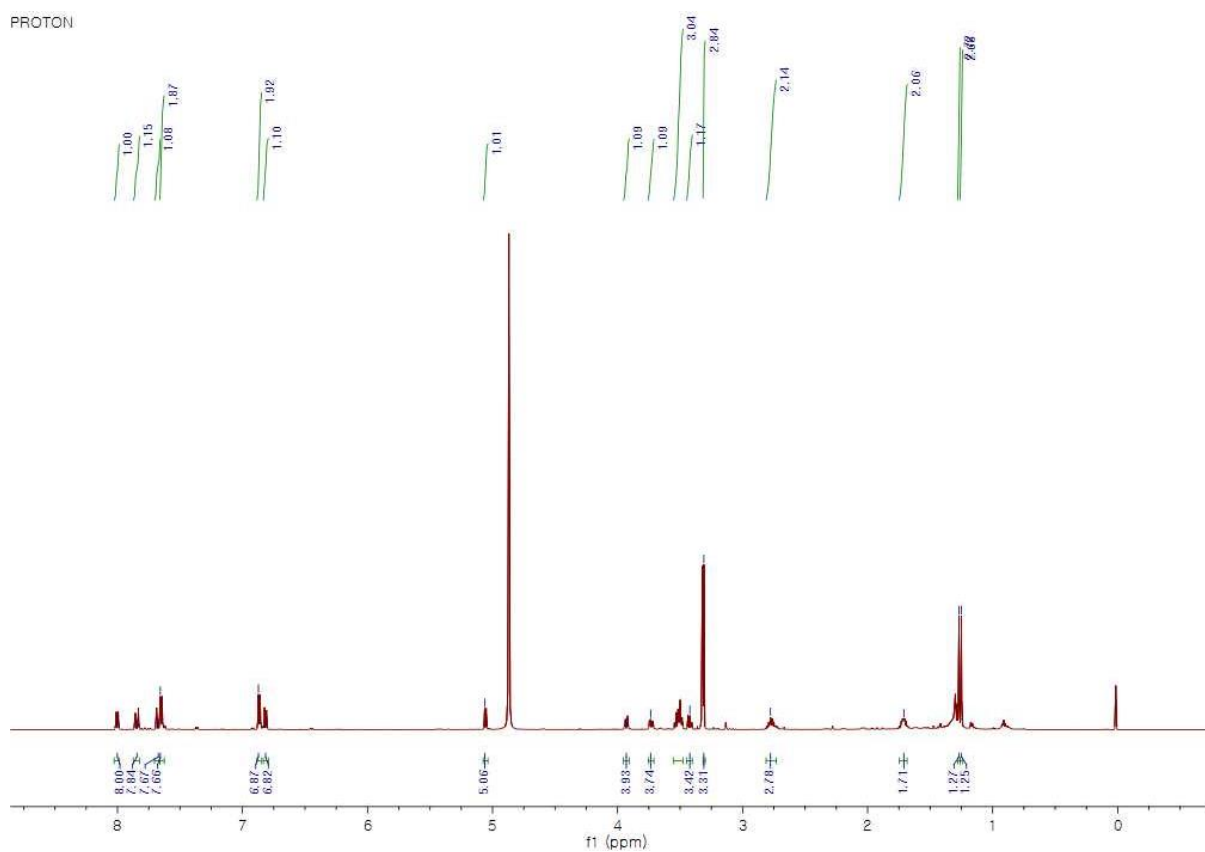

Figure S14.  $^1\text{H}$ -NMR (600 MHz, methanol- $d_4$ ) spectrum of **5**

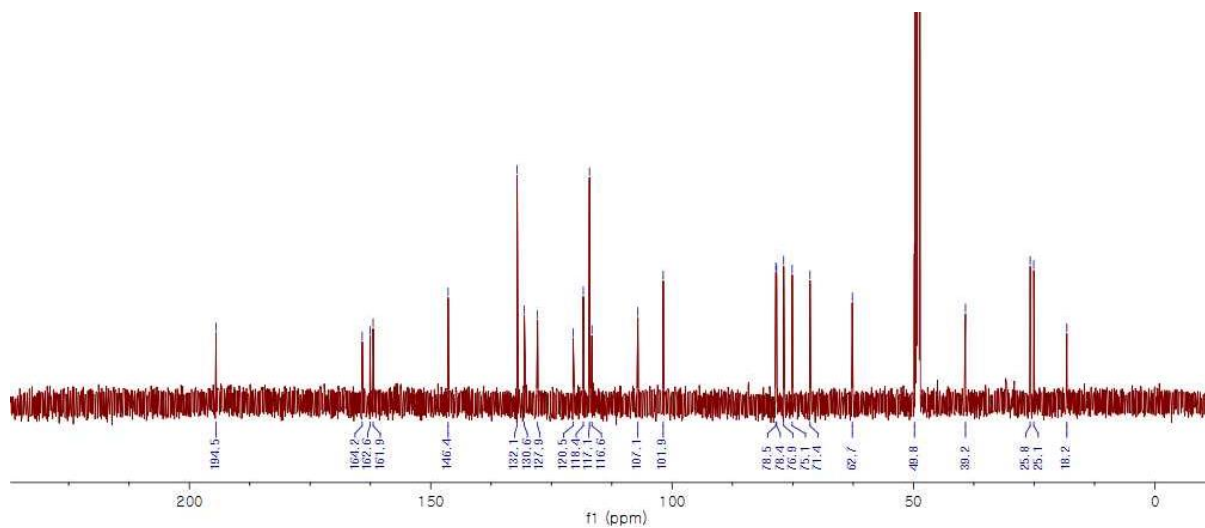

Figure S15.  $^{13}\text{C}$ -NMR (150 MHz, methanol- $d_4$ ) spectrum of **5**

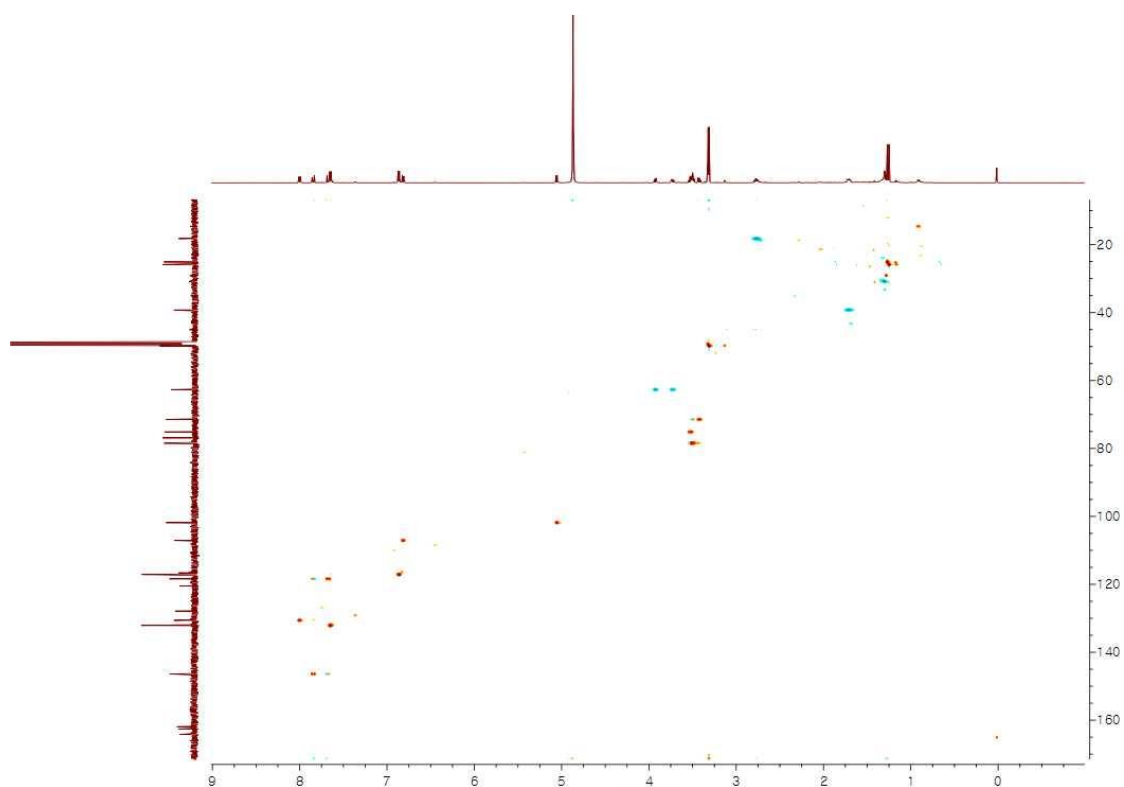

Figure S16. HSQC spectrum of **5**

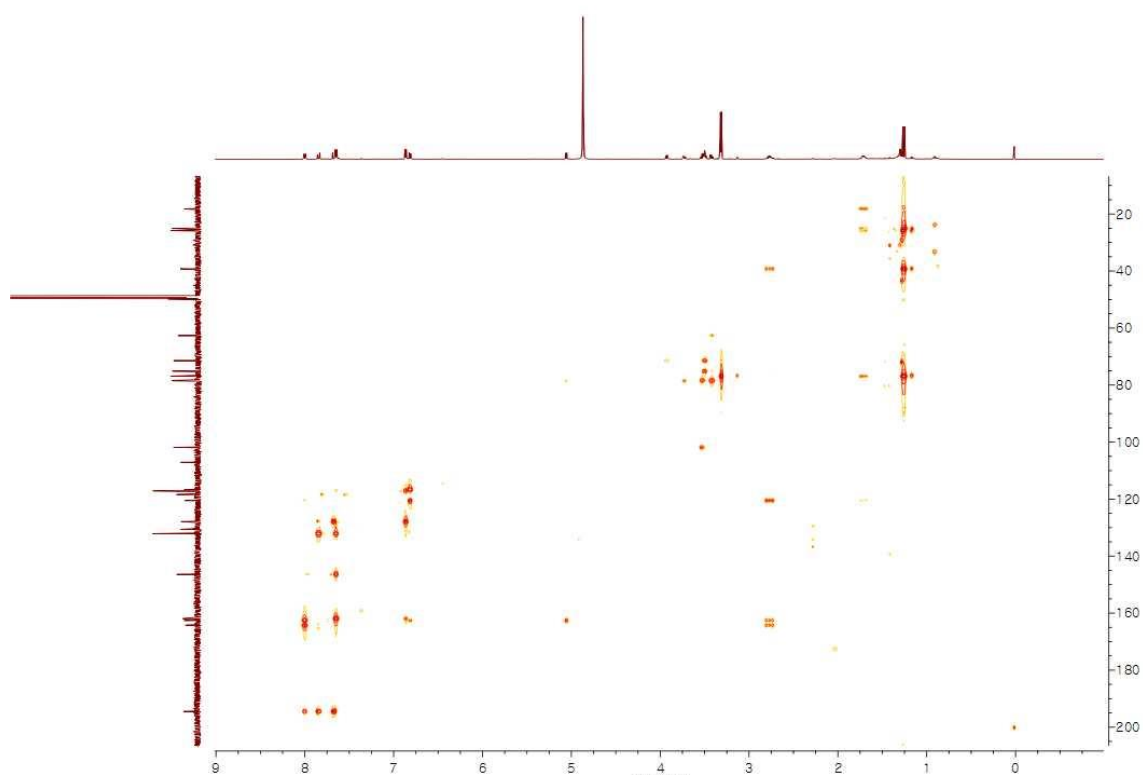

Figure S17. HMBC spectrum of **5**

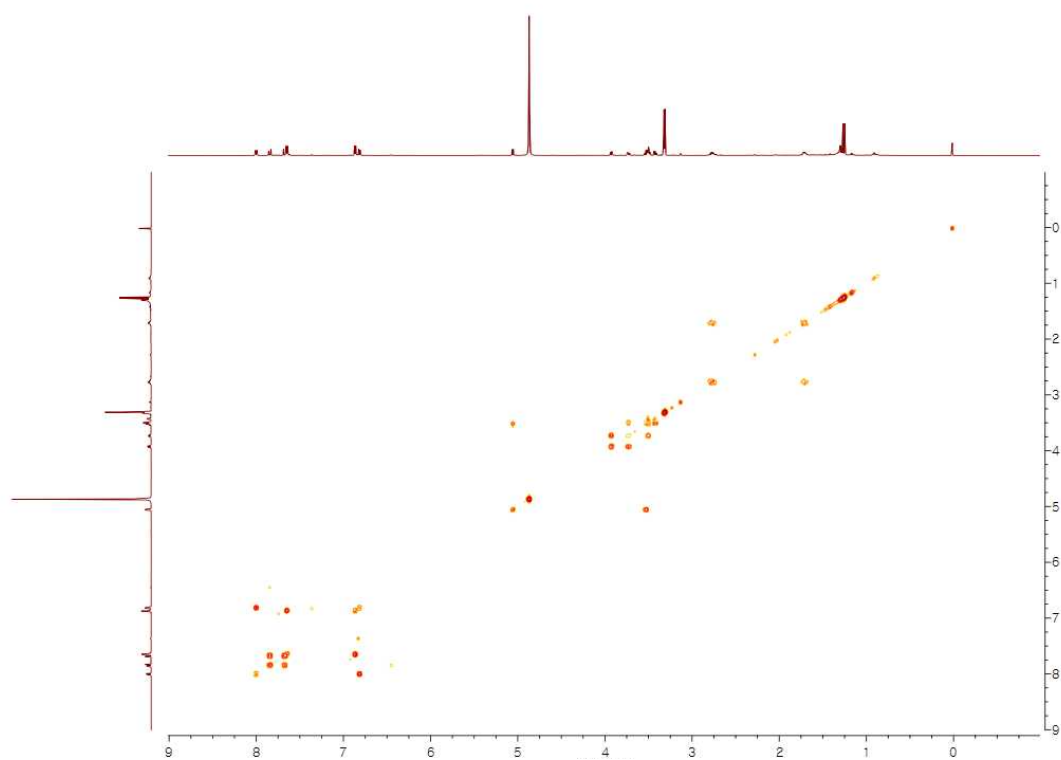

Figure S18. COSY spectrum of **5**

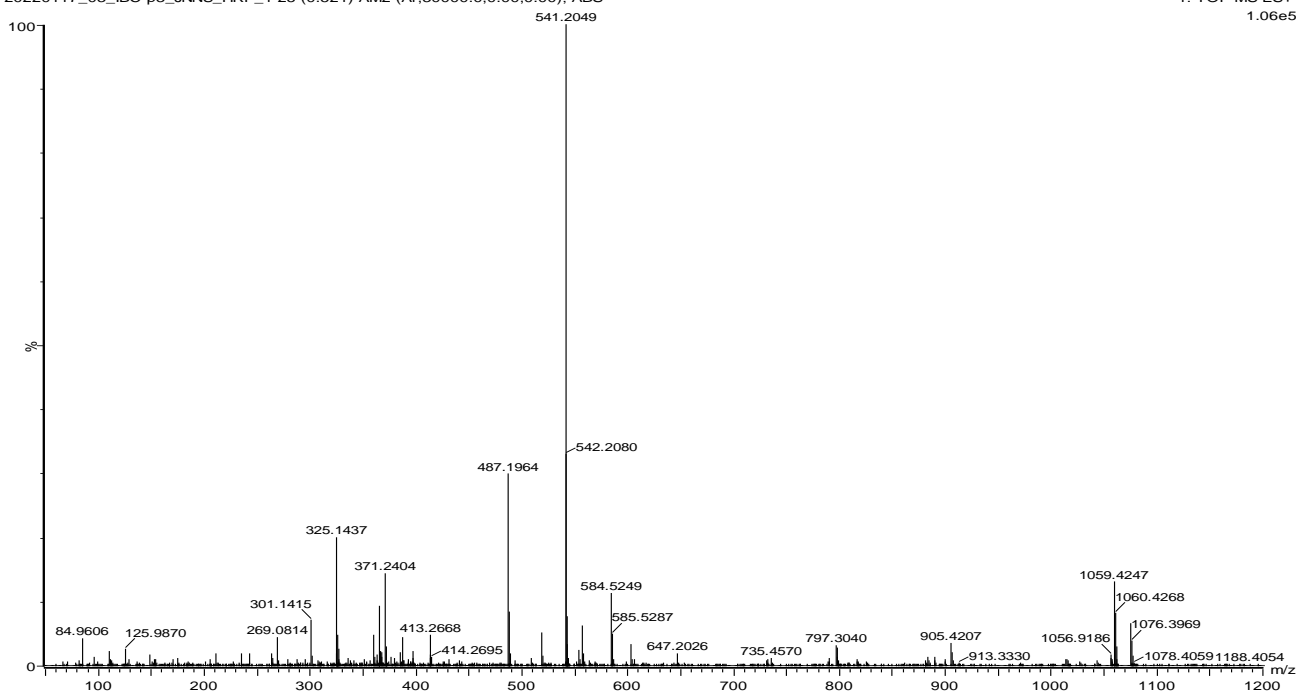

### Elemental Composition Report

#### Single Mass Analysis

Tolerance = 5.0 PPM / DBE: min = -3.0, max = 200.0

Element prediction: Off

Number of isotope peaks used for i-FIT = 3

#### Monoisotopic Mass, Even Electron Ions

Elements Used:

C: 0-35 H: 0 -50 O: 0 -10 Na: 0 -1

Minimum:

-3.0

Maximum:

300.0 5.0 200.0

| Mass     | Calc. Mass | mDa  | PPM  | DBE  | i-FIT | Norm  | Conf(%) | Formula        |
|----------|------------|------|------|------|-------|-------|---------|----------------|
| 519.2230 | 519.2230   | 0.0  | 0.0  | 10.5 | 397.1 | 0.158 | 85.36   | C27 H35 O10    |
|          | 519.2206   | 2.4  | 4.6  | 7.5  | 398.9 | 1.921 | 14.64   | C25 H36 O10 Na |
| 541.2049 | 541.2050   | -0.1 | -0.2 | 10.5 | 590.6 | 1.548 | 21.28   | C27 H34 O10 Na |
|          | 541.2074   | -2.5 | -4.6 | 13.5 | 589.3 | 0.239 | 78.72   | C29 H33 O10    |

Figure S19. HRESIMS spectrum of 5

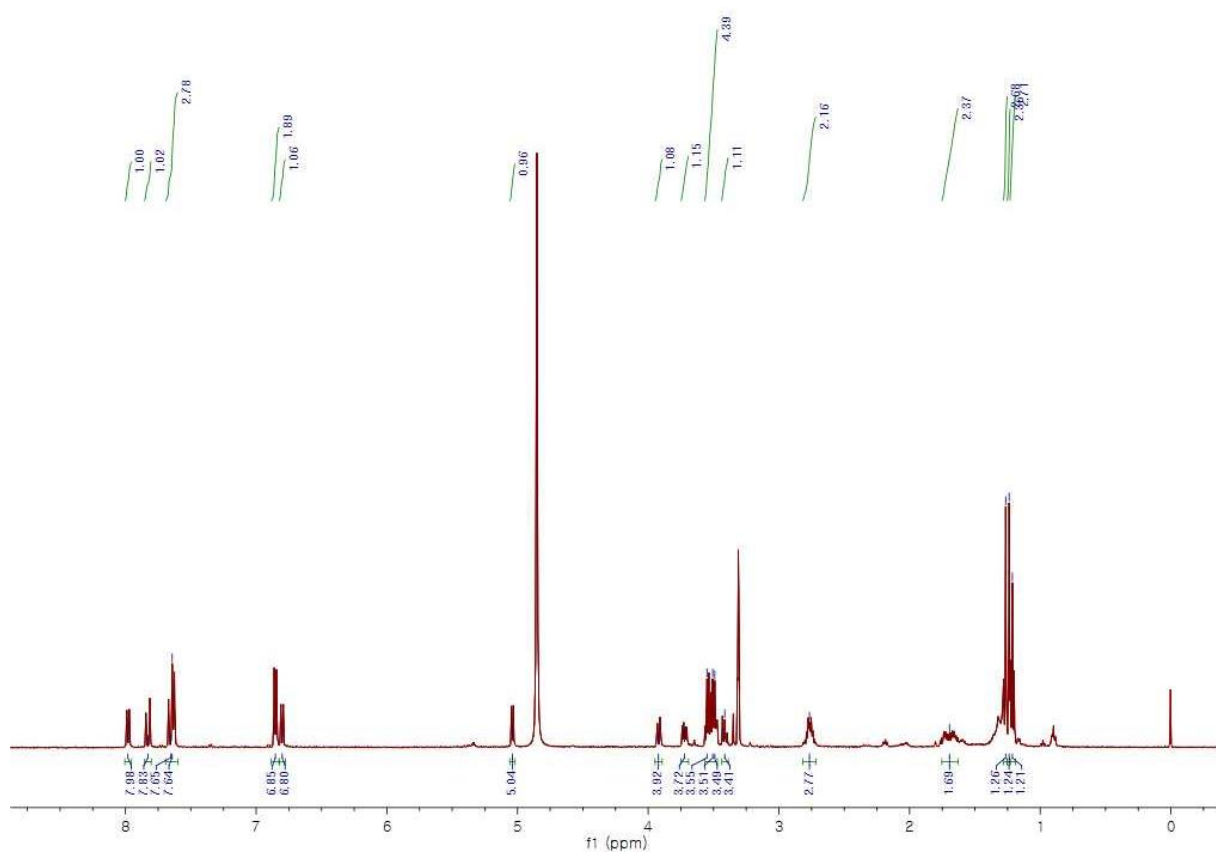

Figure S20.  $^1\text{H}$ -NMR (500 MHz,  $\text{methanol-}d_4$ ) spectrum of 7

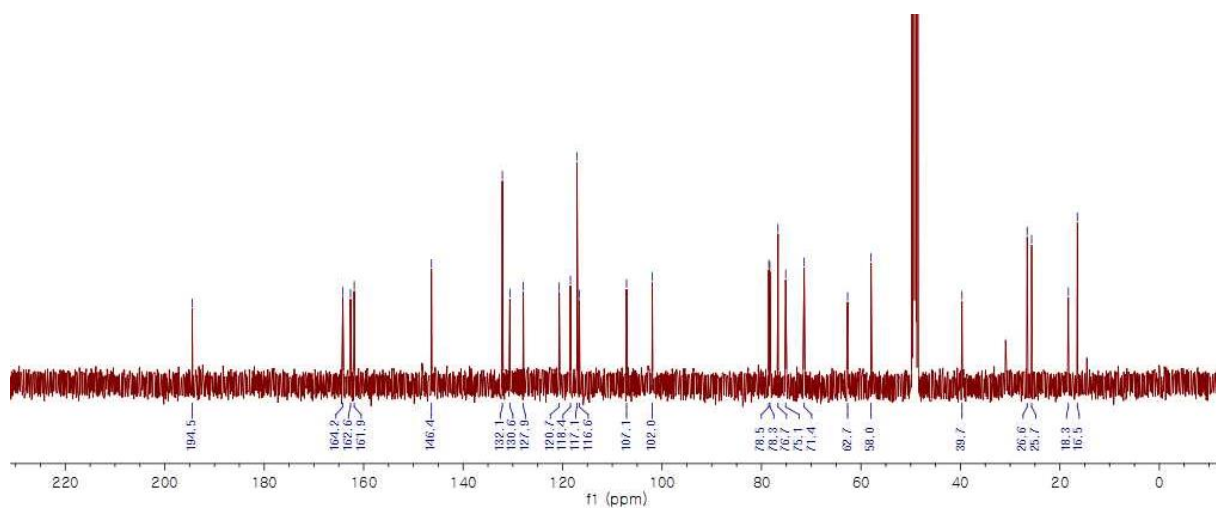

Figure S21.  $^{13}\text{C}$ -NMR (125 MHz,  $\text{methanol-}d_4$ ) spectrum of 7



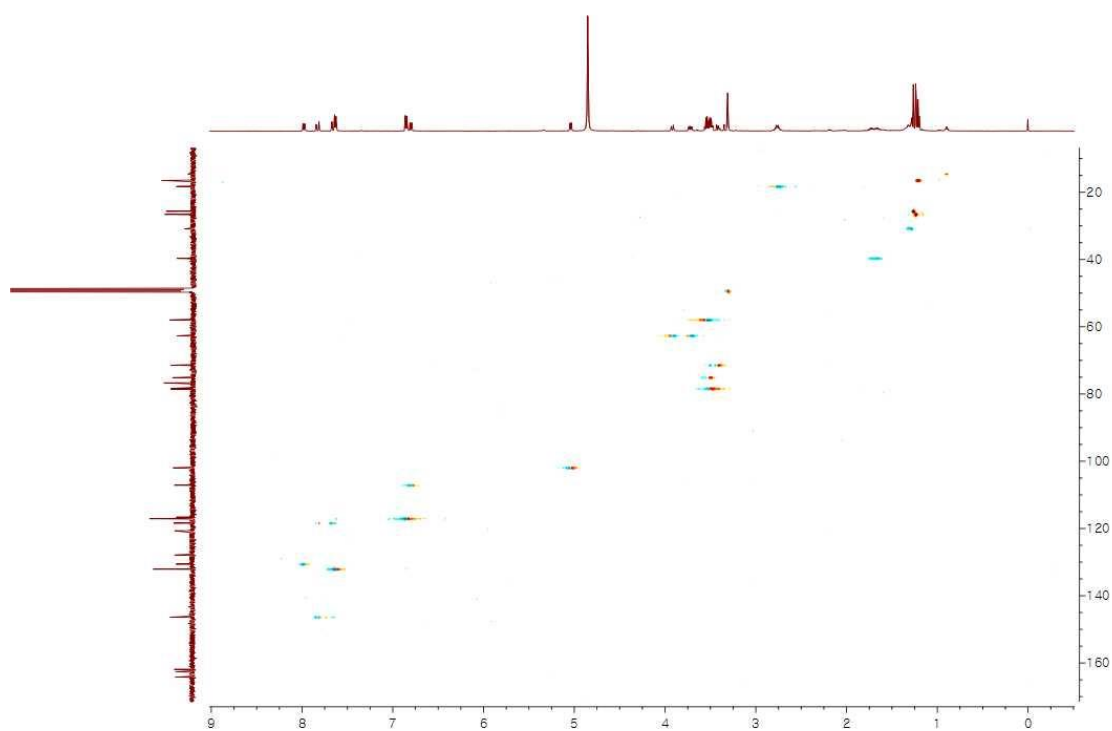

Figure S22. HSQC spectrum of 7

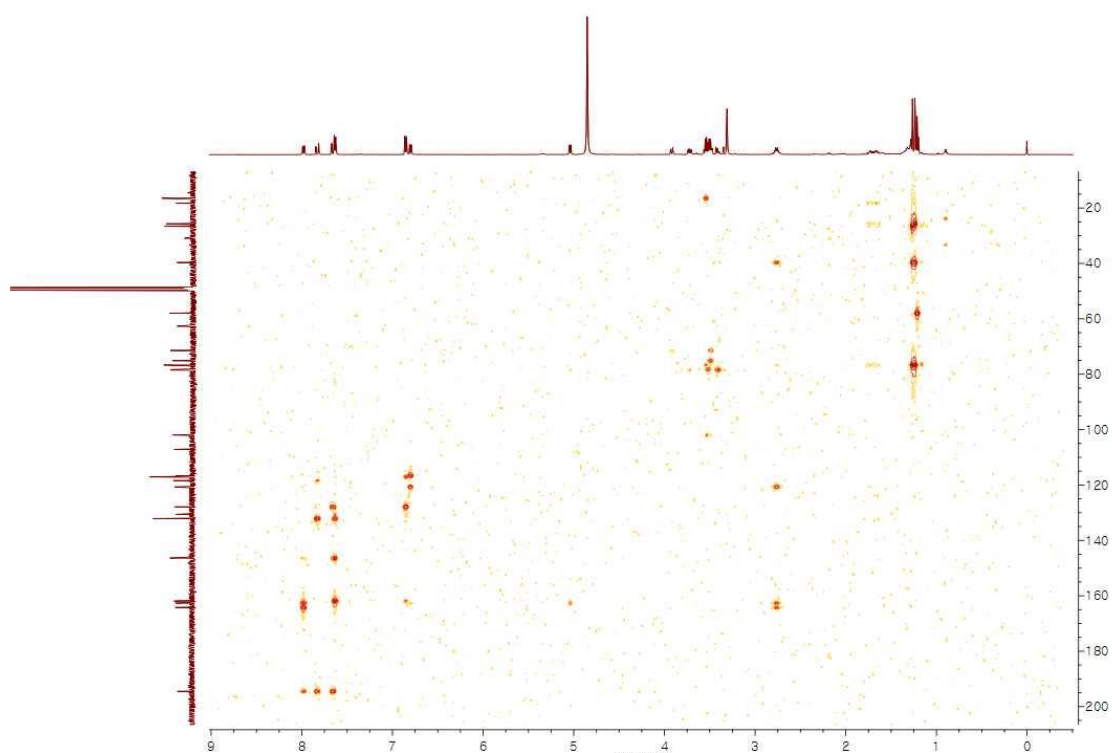

Figure S23. HMBC spectrum of 7

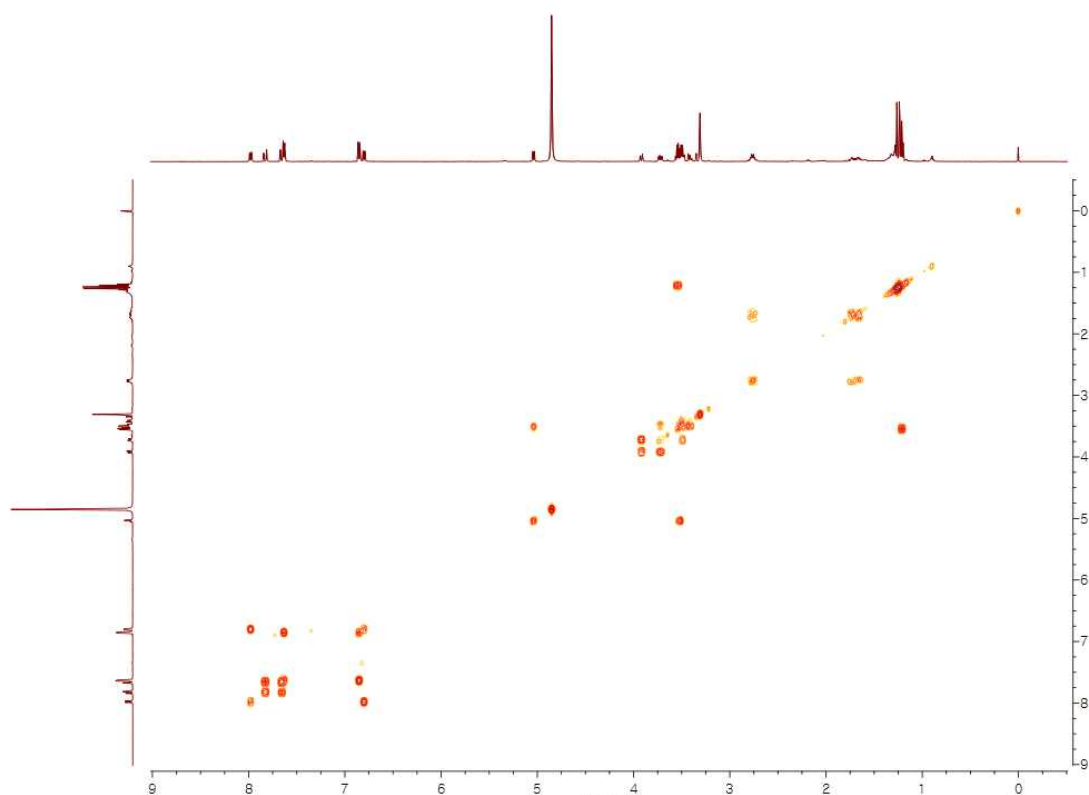

Figure S24. COSY spectrum of **7**

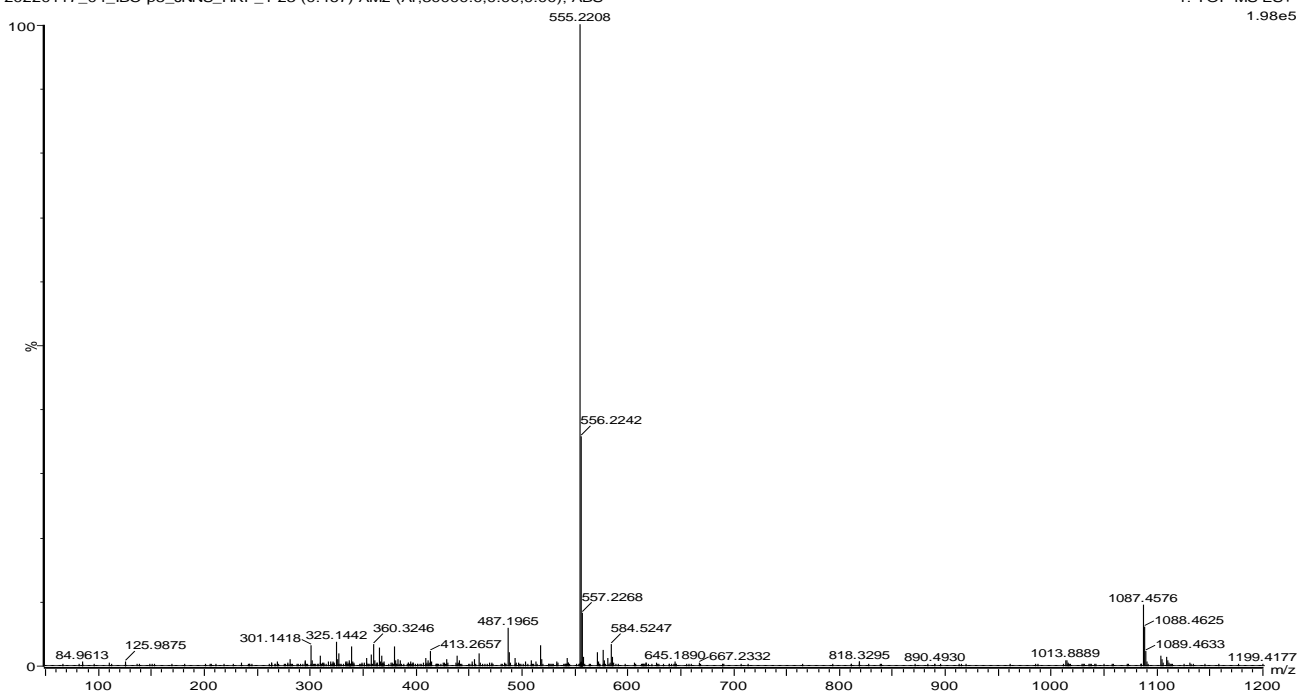

### Elemental Composition Report

Single Mass Analysis

Tolerance = 5.0 PPM / DBE: min = -3.0, max = 200.0

Element prediction: Off

Number of isotope peaks used for t-FIT = 3

Monoisotopic Mass, Even Electron Ions

47 formula(e) evaluated with 2 results within limits (all results (up to 1000) for each mass)

Elements Used:

C: 0-35 H: 0 -50 O: 0 -10 Na: 0 -1

Minimum: -3.0

Maximum: 300.0 5.0 200.0

| Mass     | Calc. Mass | mDa  | PPM  | DBE  | i-FIT | Norm  | Conf(%) | Formula        |
|----------|------------|------|------|------|-------|-------|---------|----------------|
| 555.2208 | 555.2206   | 0.2  | 0.4  | 10.5 | 663.1 | 0.784 | 45.65   | C28 H36 O10 Na |
|          | 555.2230   | -2.2 | -4.0 | 13.5 | 662.9 | 0.610 | 54.35   | C30 H35 O10    |

Figure S25. HRESIMS spectrum of 7

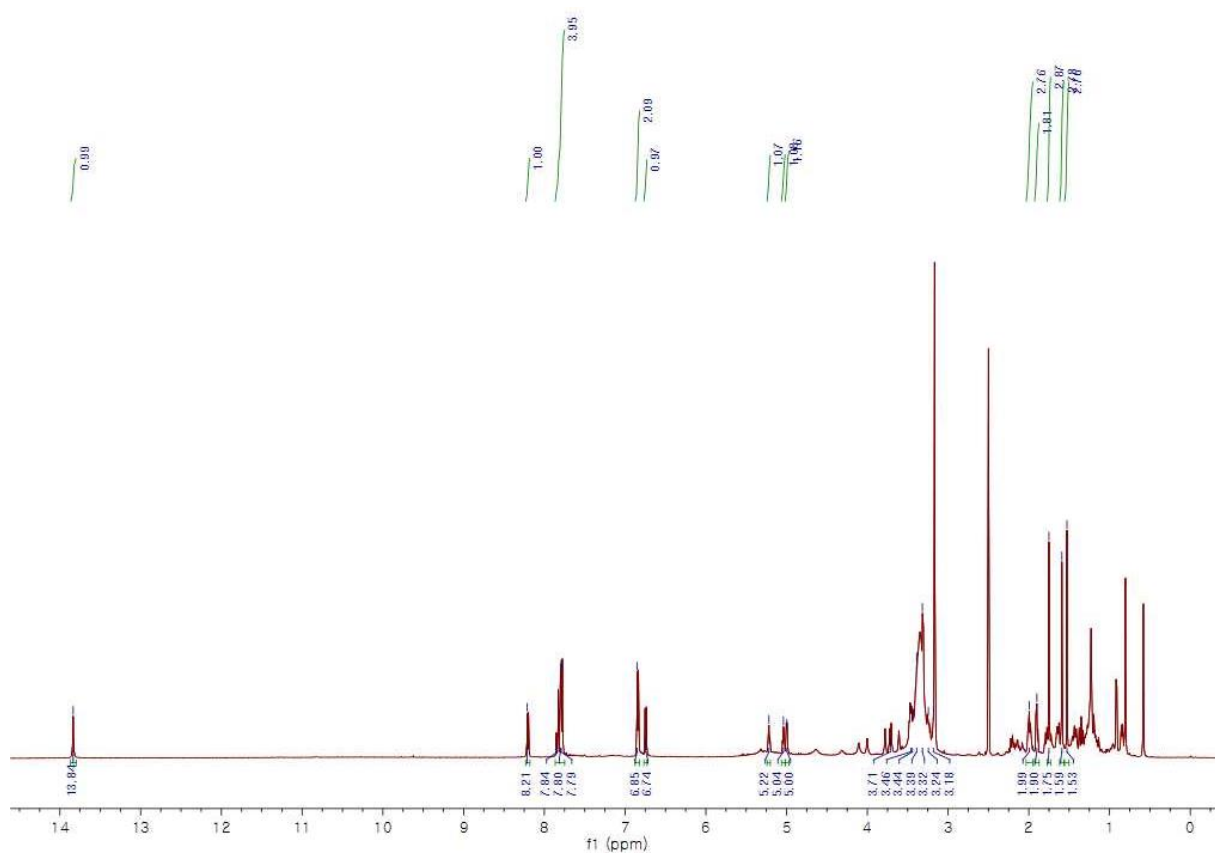

Figure S26.  $^1\text{H}$ -NMR (600 MHz,  $\text{DMSO-}d_6$ ) spectrum of **10**

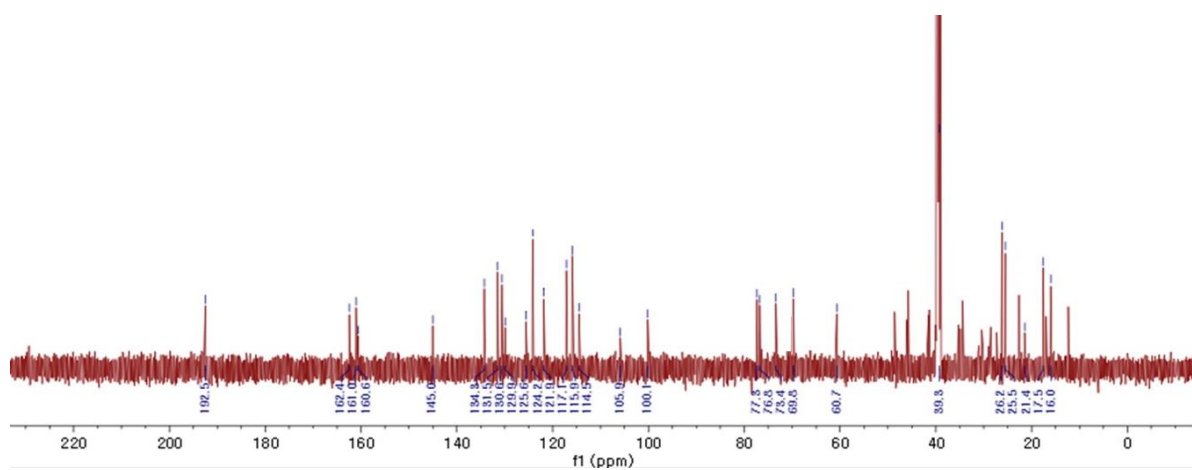

Figure S27.  $^{13}\text{C}$ -NMR (150 MHz,  $\text{DMSO-}d_6$ ) spectrum of **10**

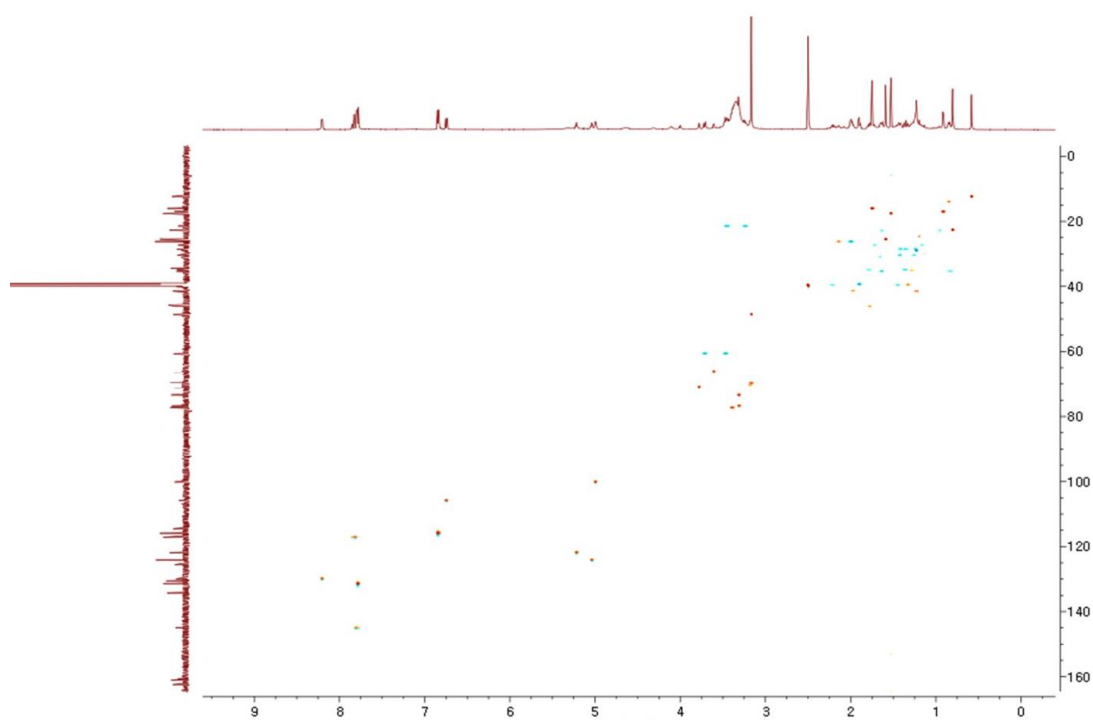

Figure S28. HSQC spectrum of **10**

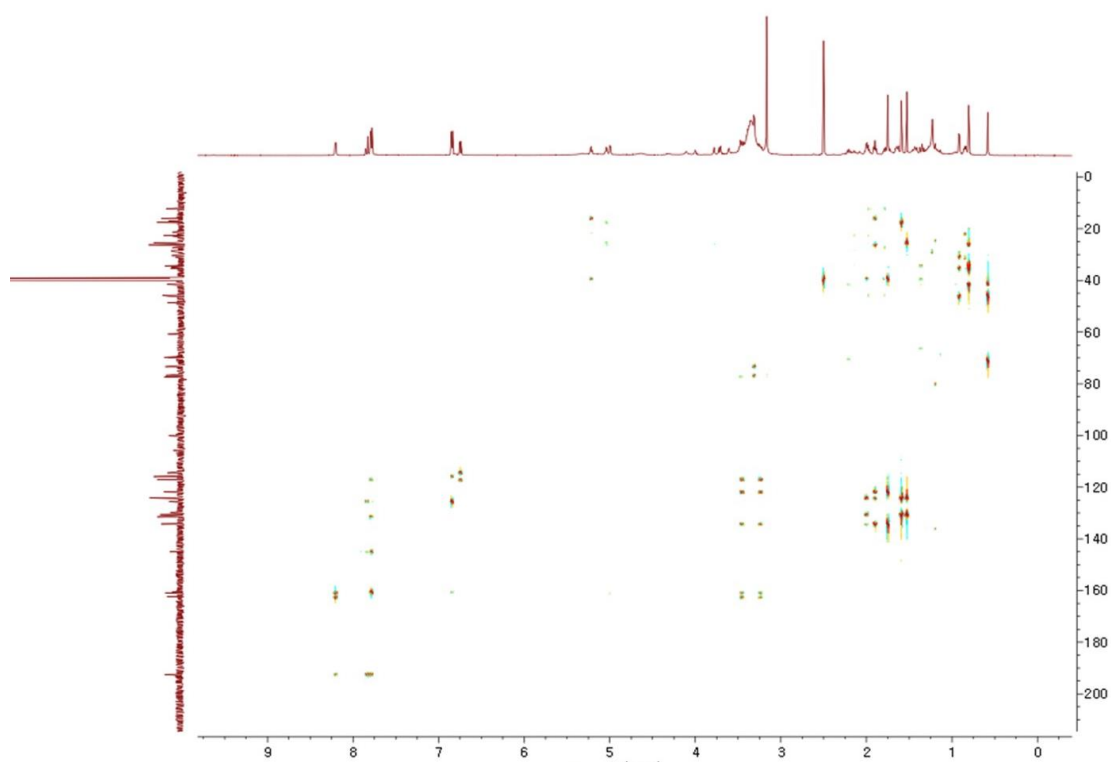

Figure S29. HMBC spectrum of **10**

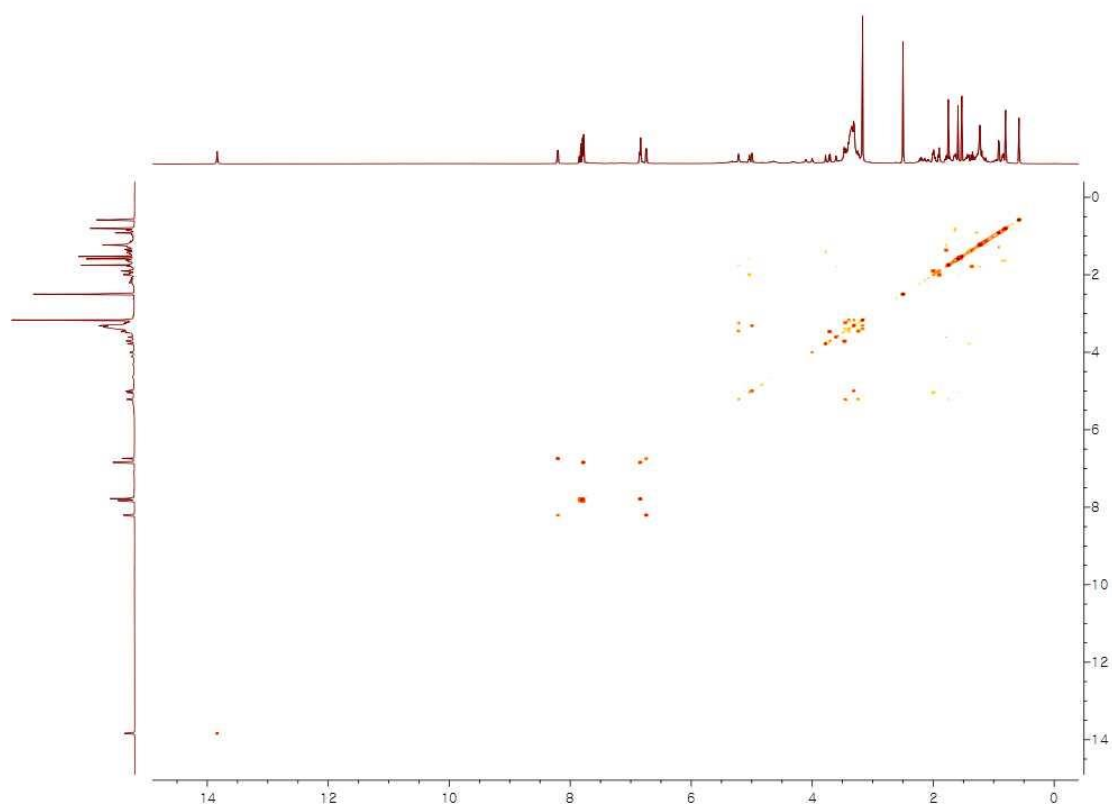

Figure S30. COSY spectrum of **10**

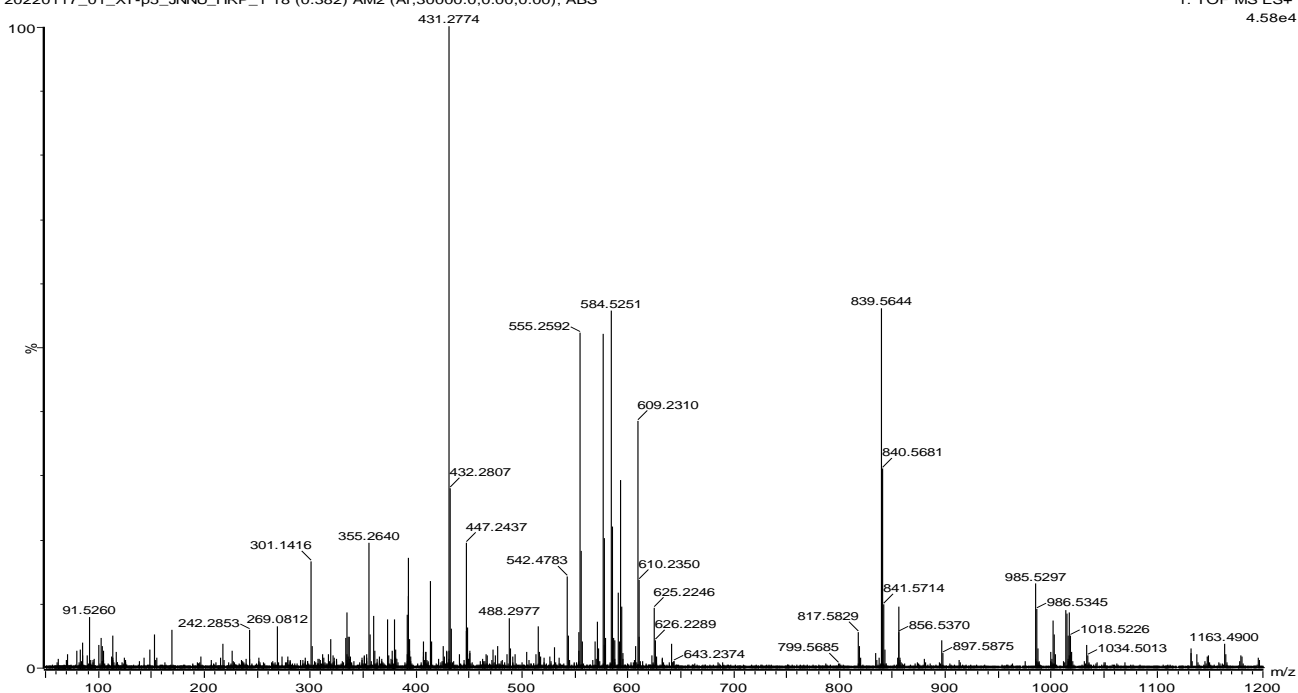

### Elemental Composition Report

#### Single Mass Analysis

Tolerance = 5.0 PPM / DBE: min = -3.0, max = 200.0

Element prediction: Off

Number of isotope peaks used for i-FIT = 3

#### Monoisotopic Mass, Even Electron Ions

Elements Used:

C: 0-35 H: 0 -50 O: 0 -10 Na: 0 -1

Minimum:

-3.0

Maximum:

300.0 5.0 200.0

| Mass     | Calc. Mass | mDa  | PPM  | DBE  | i-FIT | Norm  | Conf(%) | Formula       |
|----------|------------|------|------|------|-------|-------|---------|---------------|
| 555.2592 | 555.2594   | -0.2 | -0.4 | 12.5 | 488.7 | 0.000 | 99.96   | C31 H39 O9    |
|          | 555.2570   | 2.2  | 4.0  | 9.5  | 496.4 | 7.719 | 0.04    | C29 H40 O9 Na |
| 577.2414 | 577.2414   | 0.0  | 0.0  | 12.5 | 438.4 | 1.677 | 18.70   | C31 H38 O9 Na |
|          | 577.2438   | -2.4 | -4.2 | 15.5 | 437.0 | 0.207 | 81.30   | C33 H37 O9    |

Figure S31. HRESIMS spectrum of **10**

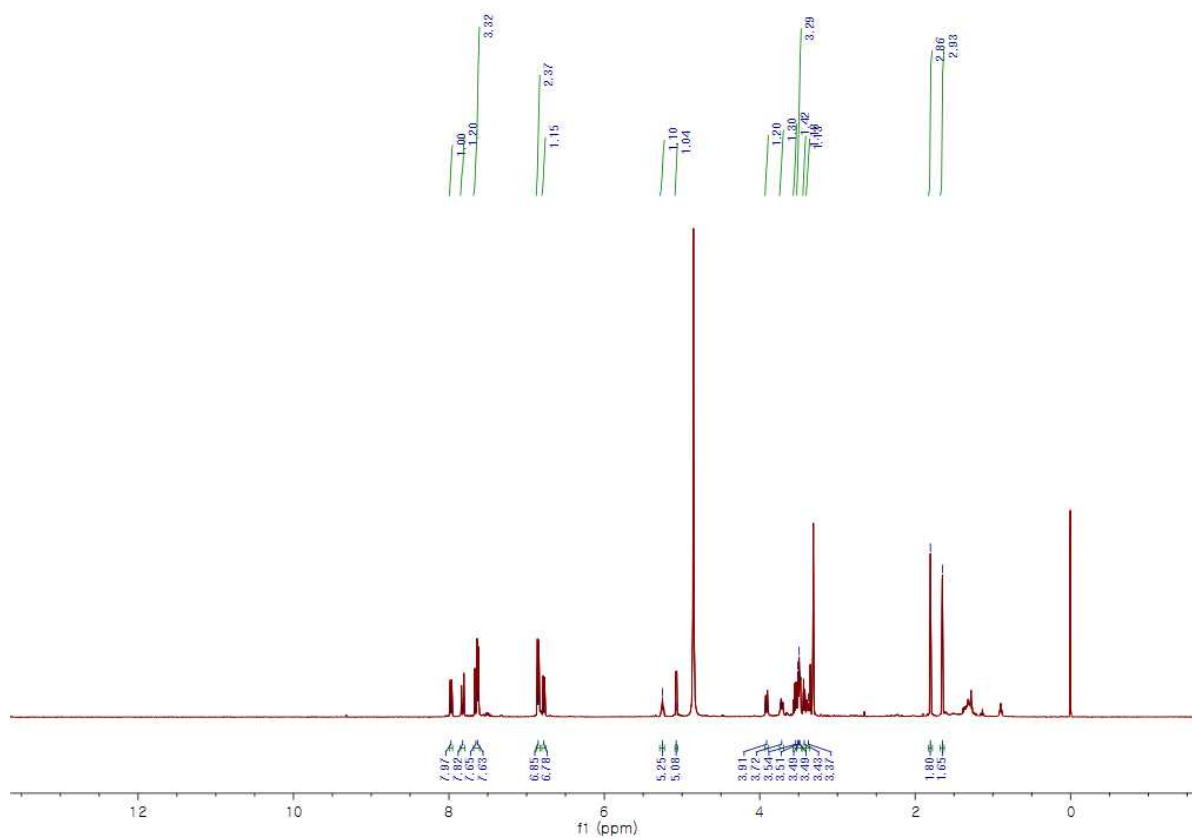

Figure S32. <sup>1</sup>H-NMR (500 MHz, methanol-*d*<sub>4</sub>) spectrum of **6**

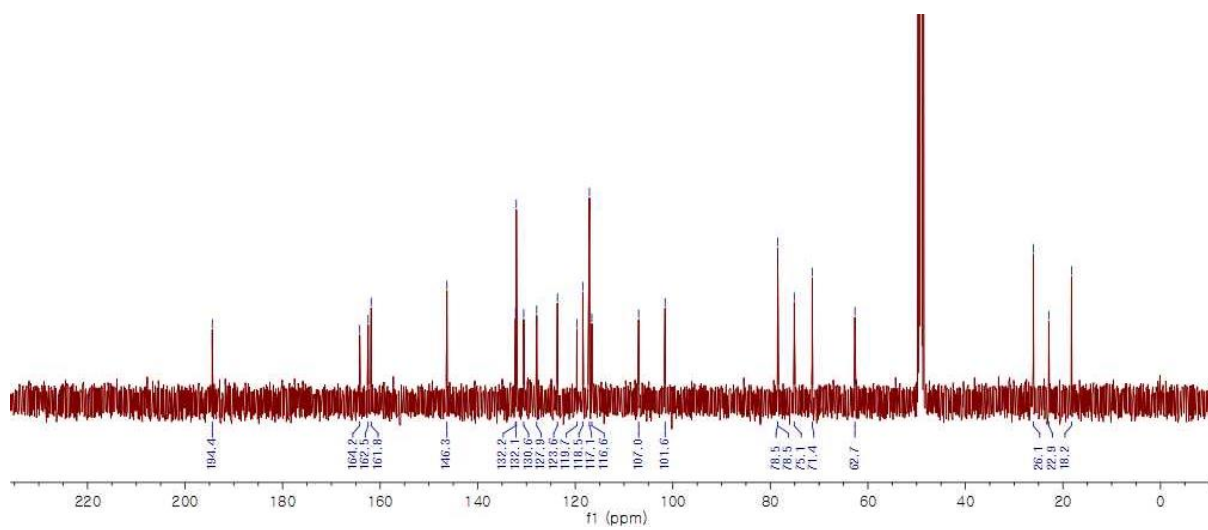

Figure S33. <sup>13</sup>C-NMR (125 MHz, methanol-*d*<sub>4</sub>) spectrum of **6**



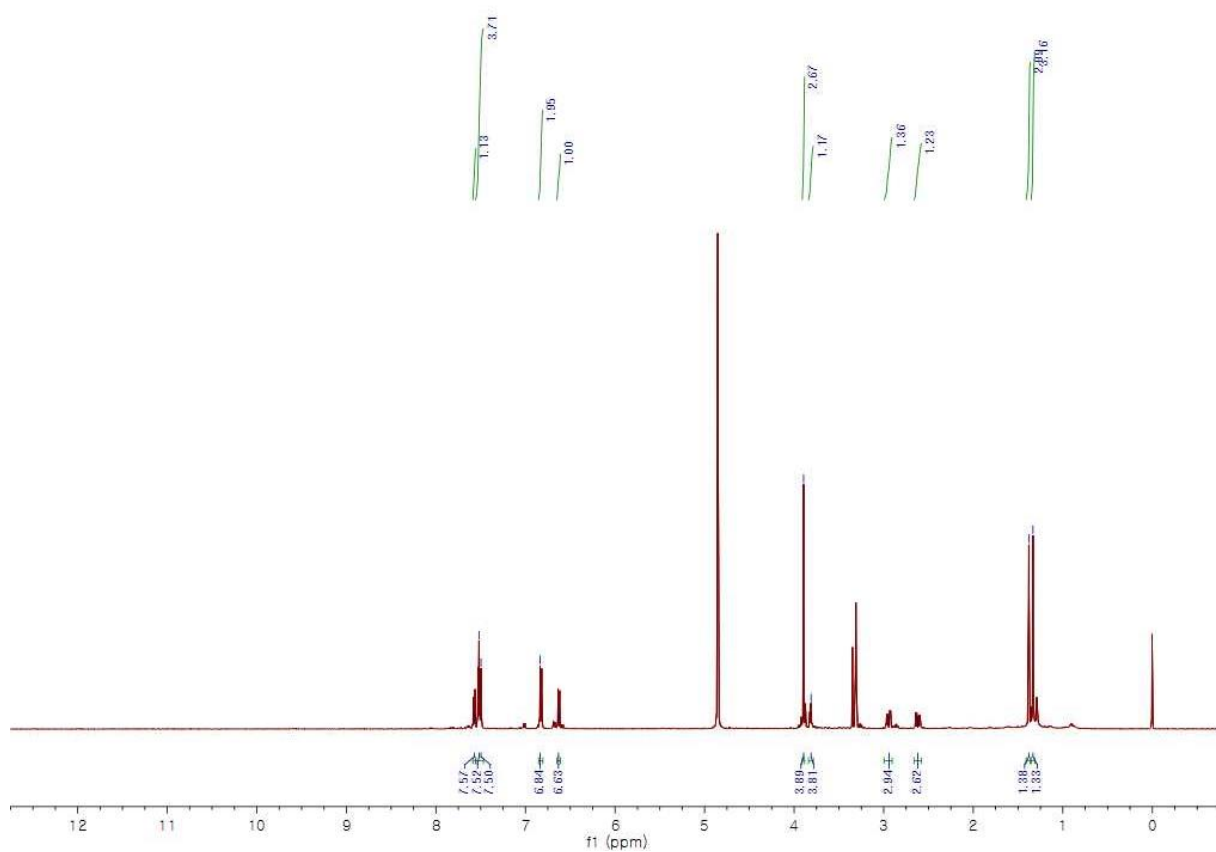

Figure S34.  $^1\text{H}$ -NMR (500 MHz, methanol- $d_4$ ) spectrum of **8**

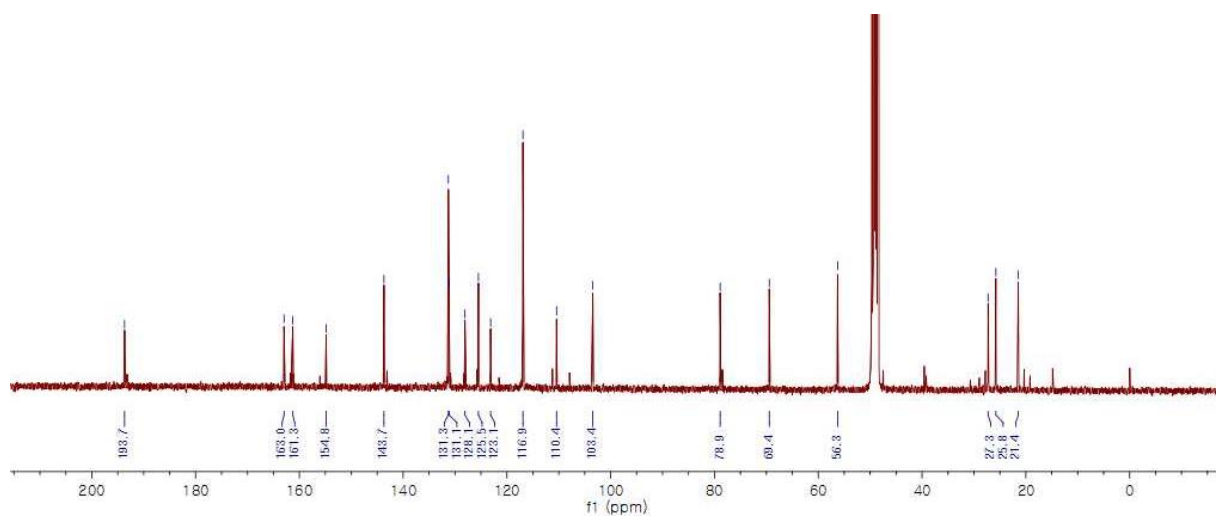

Figure S35.  $^{13}\text{C}$ -NMR (100 MHz, methanol- $d_4$ ) spectrum of **8**

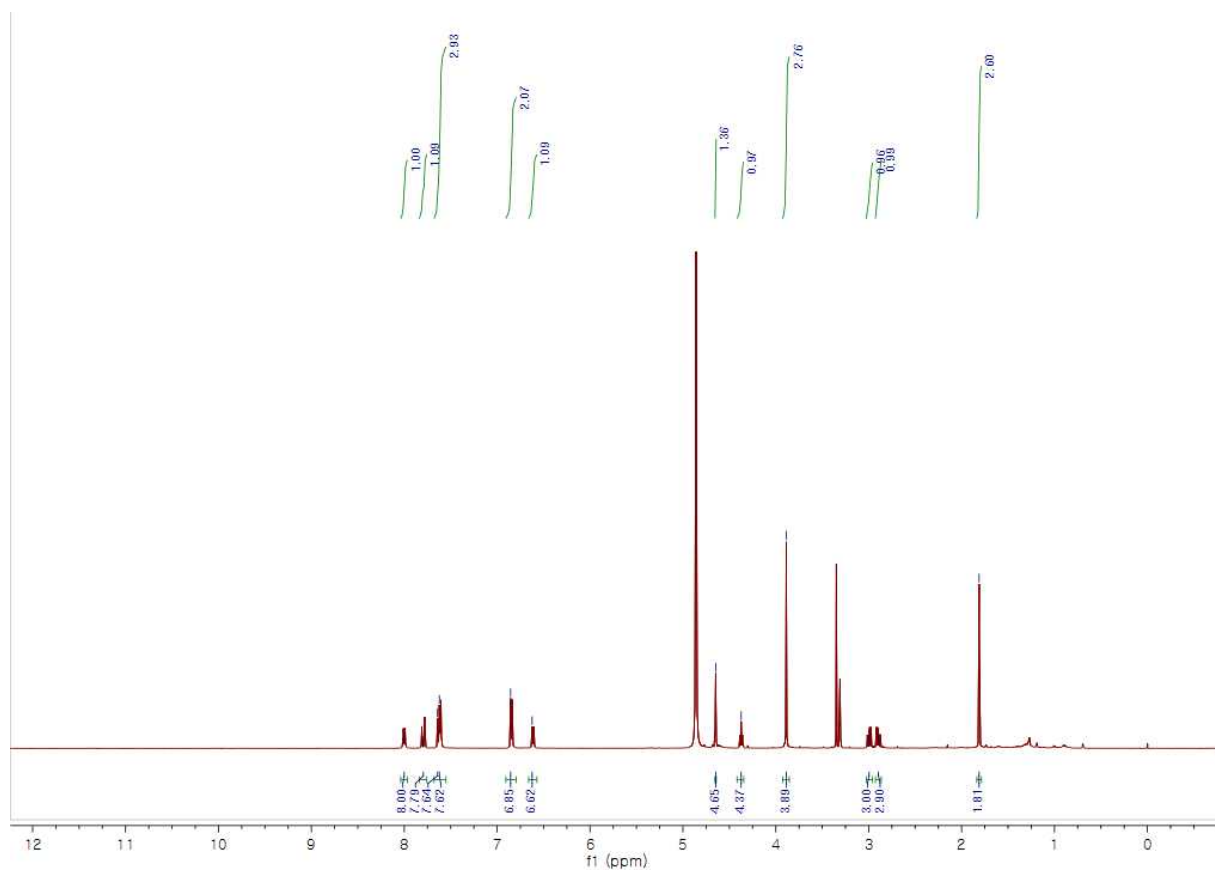

Figure S36.  $^1\text{H}$ -NMR (500 MHz, methanol- $d_4$ ) spectrum of **9**

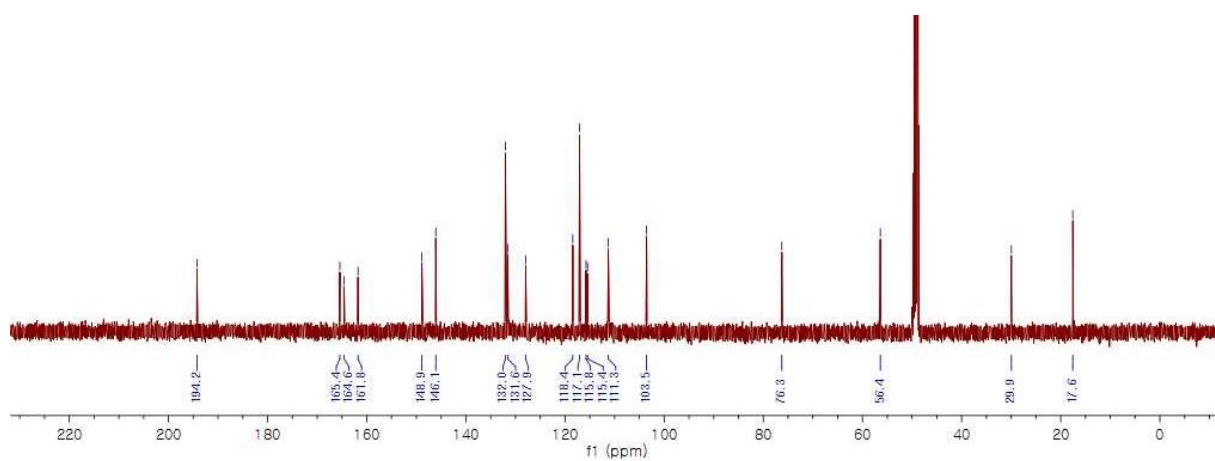

Figure S37.  $^{13}\text{C}$ -NMR (125 MHz, methanol- $d_4$ ) spectrum of **9**

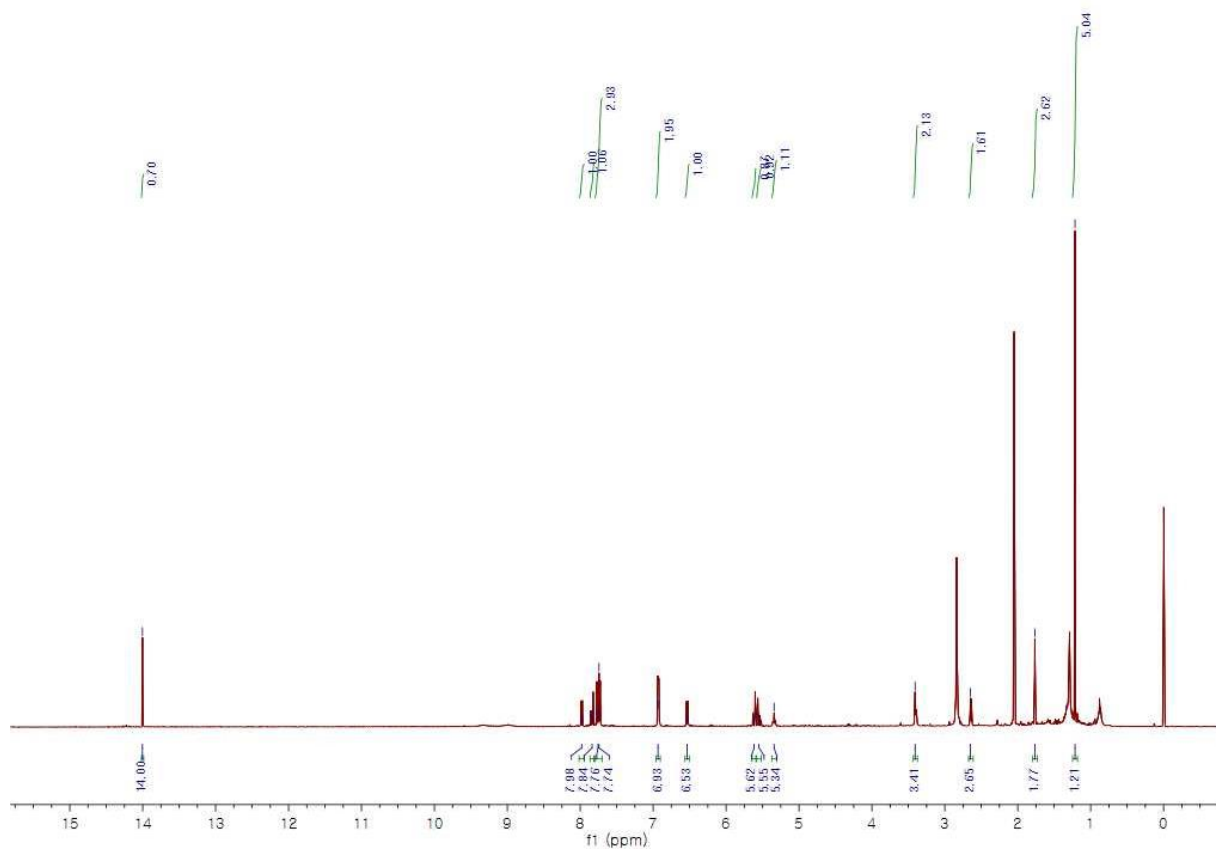

Figure S38.  $^1\text{H}$ -NMR (500 MHz, acetone- $d_6$ ) spectrum of **11**

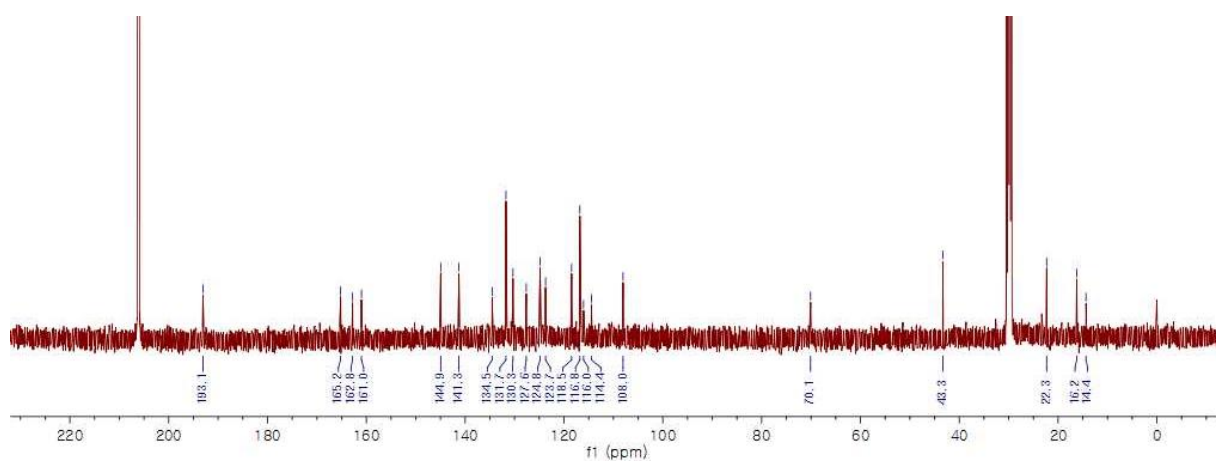

Figure S39.  $^{13}\text{C}$ -NMR (125 MHz, acetone- $d_6$ ) spectrum of **11**

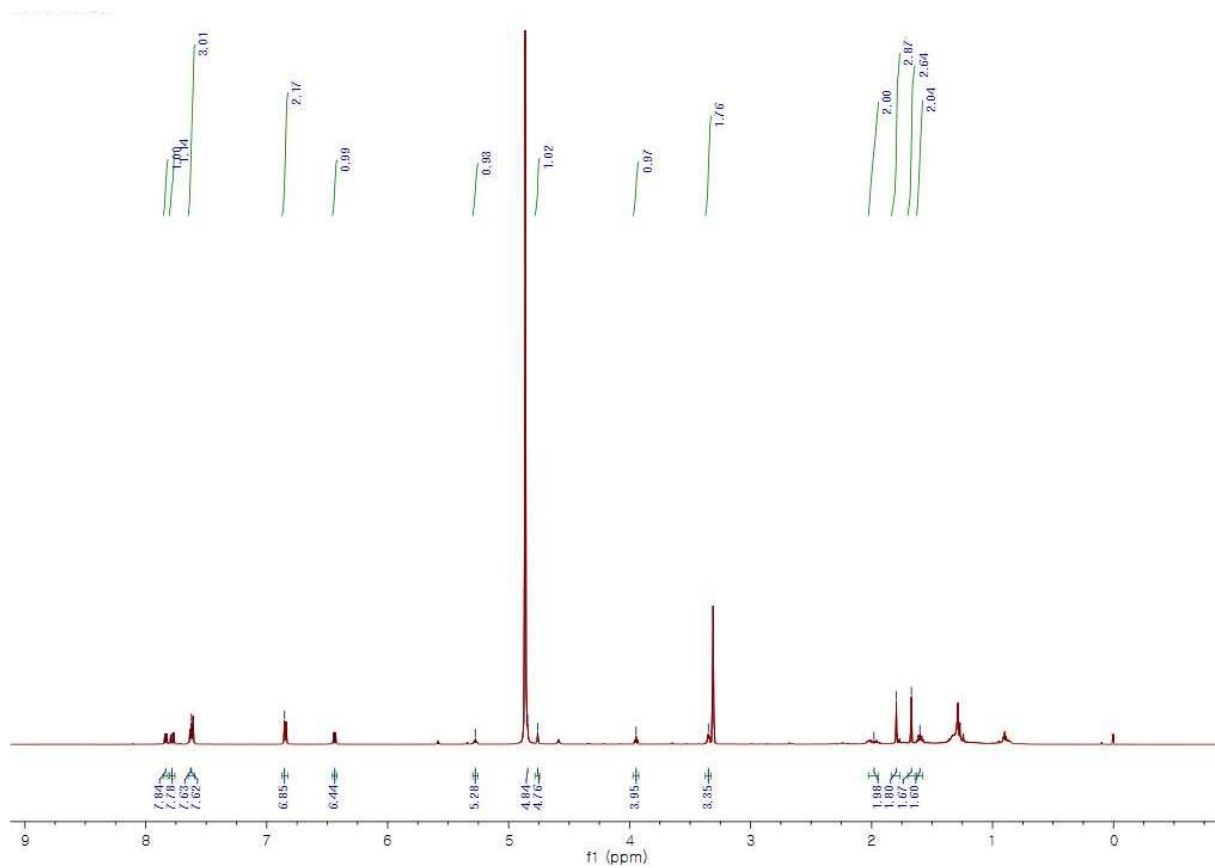

Figure S40.  $^1\text{H}$ -NMR (600 MHz, methanol- $d_4$ ) spectrum of **12**

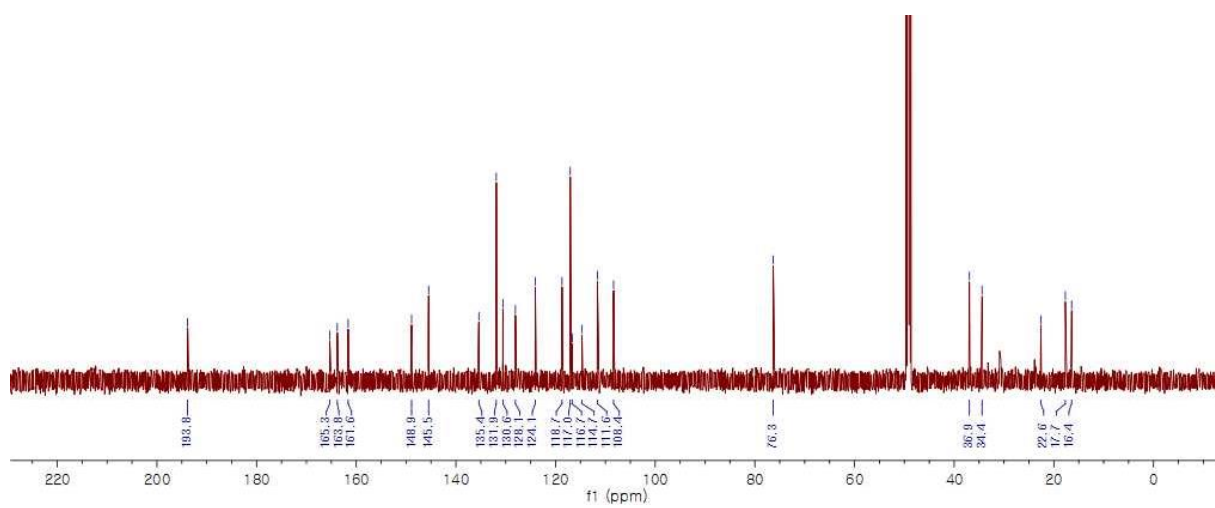

Figure S41.  $^{13}\text{C}$ -NMR (150 MHz, methanol- $d_4$ ) spectrum of **12**
